1 **Neogenin-1 distinguishes between myeloid-biased and balanced**  
2 ***Hoxb5*<sup>+</sup> long-term hematopoietic stem cells**

3  
4 **Authors**

5 Gunsagar S. Gulati<sup>1,\*</sup>, Monika Zukowska<sup>1,2\*</sup>, Joseph Noh<sup>1</sup>, Allison Zhang<sup>1</sup>, Rahul Sinha<sup>1</sup>,  
6 Benson George<sup>1</sup>, Daniel J. Wesche<sup>1</sup>, Irving L. Weissman<sup>1,3#</sup>, Krzysztof Szade<sup>1,2#</sup>

7  
8 **Affiliations**

9 <sup>1</sup> Institute for Stem Cell Biology and Regenerative Medicine, Stanford University, Stanford,  
10 California, USA.

11 <sup>2</sup> Department of Medical Biotechnology, Faculty of Biochemistry, Biophysics and  
12 Biotechnology, Jagiellonian University, Krakow, Poland.

13 <sup>3</sup> Department of Developmental Biology, Stanford University School of Medicine, Stanford, CA  
14 94305.

15  
16  
17 \*These authors contributed equally.

18  
19 **#Co-senior authors to whom correspondence should be addressed:**

20 Krzysztof Szade, Ph.D.

21 [krzysztof.szade@uj.edu.pl](mailto:krzysztof.szade@uj.edu.pl)

22  
23 Irving L. Weissman, M.D.

24 [irv@stanford.edu](mailto:irv@stanford.edu)

25 Tel: 650-723-6520

26 **ABSTRACT**

27

28 Hematopoietic stem cells (HSCs) self-renew and generate all blood cells. Recent studies with  
29 single-cell transplants and lineage tracing suggest that adult HSCs are diverse in their  
30 reconstitution and lineage potentials. However, prospective isolation of these subpopulations  
31 has remained challenging. Here, we identify Neogenin-1 (NEO1) as a novel surface marker on a  
32 fraction of mouse HSCs labeled with *Hoxb5*, a specific reporter of long-term HSCs (LT-HSCs).  
33 We show that NEO1<sup>+</sup>*Hoxb5*<sup>+</sup> LT-HSCs are more proliferative and expand with age, while NEO1<sup>-</sup>  
34 *Hoxb5*<sup>+</sup> LT-HSCs remain largely quiescent with no significant increase in number. Upon serial  
35 transplantation, NEO1<sup>+</sup>*Hoxb5*<sup>+</sup> LT-HSCs exhibit myeloid-biased differentiation and reduced  
36 reconstitution, while NEO1<sup>-</sup>*Hoxb5*<sup>+</sup> LT-HSCs are lineage-balanced and stably reconstitute  
37 recipients. Gene expression comparison further reveals evidence of lineage-priming in the  
38 NEO1<sup>+</sup> fraction. Finally, transplanted NEO1<sup>+</sup>*Hoxb5*<sup>+</sup> LT-HSCs rarely generate NEO1<sup>-</sup>*Hoxb5*<sup>+</sup> LT-  
39 HSCs, while NEO1<sup>-</sup>*Hoxb5*<sup>+</sup> LT-HSCs repopulate both LT-HSC fractions, supporting that NEO1<sup>-</sup>  
40 *Hoxb5*<sup>+</sup> LT-HSCs can hierarchically precede NEO1<sup>+</sup>*Hoxb5*<sup>+</sup> LT-HSCs.

## 41 INTRODUCTION

42  
43 The hematopoietic system is hierarchically organized into distinct cell types and cellular states  
44 with unique functions and regenerative potentials<sup>1</sup>. Residing at the apex of this hierarchy is the  
45 hematopoietic stem cell – the master orchestrator of all blood and immune development,  
46 maintenance, and regeneration. HSCs have the unique ability to self-renew and give rise to all  
47 major lineages of blood and immune cells throughout life. Over the years, combinations of  
48 surface markers<sup>2-6</sup> and reporter genes<sup>7-9</sup> have refined the definition of mouse HSCs and enabled  
49 the purification of long-term hematopoietic stem cells (LT-HSCs), a refined subset of HSCs  
50 capable of serially reconstituting irradiated recipients in a transplantation model. Recently, we  
51 identified *Hoxb5* as a specific marker of long-term repopulating cells and generated a *Hoxb5*-  
52 mCherry reporter mouse strain for the prospective isolation of these cells<sup>8</sup>. Based on this  
53 definition, only 7-35% of previously described phenotypic HSCs (pHSCs) are LT-HSCs.

54  
55 Although *Hoxb5*<sup>+</sup> LT-HSCs self-renew and reconstitute all major blood lineages through serial  
56 transplantations<sup>8</sup>, the functional heterogeneity within this compartment has not yet been  
57 characterized. Understanding the composition of LT-HSCs may offer valuable insights into the  
58 mechanism of HSC expansion with age, as well the competition of diverse HSCs for bone  
59 marrow niches<sup>10,11</sup>. On a per cell basis, HSCs from older mice exhibit biased differentiation  
60 towards myeloid lineages and reduced stem cell activity, presumably due to weaker responses  
61 to SDF-1<sup>11,12</sup> and poorer engraftability of HSCs in G1<sup>13</sup> and S/G2/M<sup>14</sup>. These aged HSCs may  
62 arise from either the cell-intrinsic transition of balanced to myeloid-biased LT-HSCs or the clonal  
63 expansion of pre-existing fractions of myeloid-biased LT-HSCs<sup>10,11,15-17</sup>. Several studies support  
64 the presence of pre-existing myeloid-biased LT-HSCs by demonstrating that myeloid-biased  
65 subpopulations of LT-HSCs in young, healthy mice respond to environmental challenges, such  
66 as inflammation and infection<sup>18,19</sup>. Results from lineage tracing with genetic barcodes<sup>20,21</sup> and  
67 single cell transplants of LT-HSCs also support the notion of inherent functional diversity among  
68 long-term repopulating HSCs<sup>22-24</sup>. However, these studies did not identify markers to  
69 prospectively isolate distinct sub-populations of HSCs. Several groups have identified markers,  
70 such as CD150<sup>15</sup>, CD41<sup>25</sup>, vWF<sup>26</sup>, and CD61<sup>18</sup> that enrich for self-renewing lineage-biased  
71 subpopulations of HSCs. However, these markers were shown to segregate fractions of  
72 immunophenotypically defined HSCs (pHSCs), which contain both short-term, *Hoxb5*<sup>-</sup> and long-  
73 term, *Hoxb5*<sup>+</sup> HSCs. Therefore, we sought to interrogate the heterogeneity among purified  
74 *Hoxb5*<sup>+</sup> LT-HSCs and identify a strategy to prospectively isolate these cells with phenotypic  
75 markers.

76  
77 Here, we find that Neogenin-1 (NEO1), a transmembrane receptor of the immunoglobulin  
78 family<sup>27</sup>, is expressed on a fraction of *Hoxb5*<sup>+</sup> LT-HSCs and decreases with differentiation.  
79 Although NEO1 has been extensively investigated as a receptor for axon guidance<sup>28,29</sup>,  
80 neuronal survival<sup>30</sup>, skeletal myofiber differentiation<sup>31</sup>, intracellular iron homeostasis<sup>32</sup>, mammary  
81 epithelial development<sup>33</sup>, and endothelial migration<sup>34</sup>, as of yet, little is known about its role in  
82 bone marrow hematopoiesis. We find that NEO1<sup>+</sup>*Hoxb5*<sup>+</sup> LT-HSCs represent a myeloid-biased  
83 subset of LT-HSCs that responds to myeloablative stress and expands with age. Contrastingly,  
84 NEO1<sup>-</sup>*Hoxb5*<sup>+</sup> LT-HSCs exhibit greater reconstitution potential, balanced lineage output, and a  
85 more quiescent cell cycle status compared to NEO1<sup>+</sup>*Hoxb5*<sup>+</sup> LT-HSCs. After transplant, NEO1<sup>-</sup>  
86 *Hoxb5*<sup>+</sup> LT-HSCs give rise to NEO1<sup>+</sup>*Hoxb5*<sup>+</sup> LT-HSCs, but the reverse transition is rarely  
87 observed. We, therefore, propose a model of early long-term hematopoiesis in which balanced,  
88 quiescent LT-HSCs self-renew and generate long-term myeloid-biased LT-HSCs in response to  
89 stress and during the course of aging.

## 90 RESULTS

### 91 **Neogenin-1 (NEO1) marks a subpopulation of mouse *Hoxb5*<sup>+</sup> LT-HSCs and human HSCs**

92 Functional heterogeneity within *Hoxb5*<sup>+</sup> LT-HSCs is poorly understood. To identify surface  
93 candidates that fractionate *Hoxb5*<sup>+</sup> LT-HSCs, we first pattern-searched 64 microarray  
94 expression profiles of 23 distinct mouse hematopoietic cell types<sup>35</sup> for (1) genes annotated to  
95 code for cell surface proteins (GO Biological Process: 0009986) and (2) genes specifically  
96 expressed in HSCs compared to downstream cell types (**Fig. 1a**). We found several known  
97 HSC-specific markers, including *Robo4*<sup>36</sup>, *Slamf1*<sup>5</sup>, *Ly6a*<sup>2</sup>, *Vwf*<sup>26</sup>, *TEK*<sup>37</sup>, and a member of the  
98 *Gpcr5* family<sup>38</sup>, validating the utility of our approach. We also identified several novel markers of  
99 HSCs that have not been previously reported (**Fig. 1a**). Among the top 3 most enriched surface  
100 markers on HSCs, Neogenin-1 (*Neo1*) was more highly expressed on HSCs compared to the  
101 other two candidates (**Fig. 1a,b**). Single-cell RNA-sequencing data of hematopoietic stem and  
102 progenitor cells validated the enriched expression of *Neo1* in LT-HSCs compared to  
103 downstream short-term HSCs and progenitors and further suggested that *Neo1* may uniquely  
104 mark a subpopulation of LT-HSCs (**Supplementary Fig. 1a,b**).  
105

106  
107 We next used flow cytometry to measure the relative protein levels of NEO1 on the surface of 2-  
108 to-3-month-old early hematopoietic progenitors, multipotent progenitor subset A (MPPa),  
109 multipotent progenitor subset B (MPPb), phenotypic HSCs defined as Lin<sup>-</sup>c-KIT<sup>+</sup>SCA1<sup>+</sup>CD48<sup>-</sup>  
110 FLK2<sup>-</sup>CD150<sup>+</sup>CD34<sup>-</sup> (hereafter referred to as pHSCs), and two populations among pHSCs,  
111 including *Hoxb5*<sup>+</sup> LT-HSCs and *Hoxb5*<sup>-</sup> short-term HSCs (ST-HSCs) (**Fig. 1c; Supplementary**  
112 **Fig. 2**). Consistent with its gene expression, the relative protein levels of NEO1 and the  
113 frequency of NEO1<sup>+</sup> cells progressively decreased with differentiation. NEO1<sup>+</sup> cells comprised a  
114 significantly higher fraction of *Hoxb5*<sup>+</sup> LT-HSCs compared to downstream cells (**Fig. 1c,d**).  
115 NEO1 was also expressed on a fraction of long-term reconstituting Lin<sup>-</sup>CD34<sup>+</sup>CD38<sup>-</sup>CD45RA<sup>-</sup>  
116 CD90<sup>+</sup> HSCs from human bone marrow<sup>39</sup>, although NEO1 enrichment in human HSCs was  
117 diminished compared to that observed in mouse HSCs (**Fig. 1e,f**).  
118

### 119 **NEO1<sup>+</sup>*Hoxb5*<sup>+</sup> LT-HSCs selectively expand with age and respond to myeloablative stress**

120 Previous studies have shown that a subpopulation of pHSCs expands with age<sup>15,23</sup> and  
121 responds to environmental challenge<sup>18,19</sup>. However, the effect of aging and stress on LT-HSCs  
122 and their subpopulations have not yet been evaluated. To that end, we first measured the  
123 number and frequency of *Hoxb5*<sup>+</sup> LT-HSCs (**Fig. 2a-d**) and NEO1<sup>+</sup> and NEO1<sup>-</sup> fractions (**Fig.**  
124 **2e-h**) in 2-month, 5-month, 13-month, and 22-month-old bone marrow. Consistent with the  
125 overall expansion of pHSCs (**Supplementary Fig. 3a**), we observed that the total number of  
126 *Hoxb5*<sup>+</sup> LT-HSCs and *Hoxb5*<sup>-</sup> ST-HSCs were significantly increased (**Figure 2c,d**). The  
127 frequency of *Hoxb5*<sup>+</sup> LT-HSCs among pHSCs, although on average higher in bone marrow from  
128 older (13-month-old and 22-month-old) than younger (2-month-old and 5-month-old) mice, was  
129 highly variable in aged mice (**Fig. 2a,b**).  
130

131 Despite the variable expansion of *Hoxb5*<sup>+</sup> LT-HSCs, the frequency of NEO1<sup>+</sup> cells among  
132 *Hoxb5*<sup>+</sup> LT-HSCs progressively increased with age in a consistent manner (**Fig. 2e,f**). In fact,  
133 fewer than 2% of *Hoxb5*<sup>+</sup> LT-HSCs in E16.5 fetal livers expressed surface NEO1, while >80% of  
134 22-month-old *Hoxb5*<sup>+</sup> LT-HSCs were NEO1<sup>+</sup> (**Supplementary Figure 3b; Fig. 2e,f**). However,  
135 while the number of NEO1<sup>+</sup> cells per million whole bone marrow cells increased with age (**Fig.**  
136 **2g**), the number of NEO1<sup>-</sup>*Hoxb5*<sup>+</sup> LT-HSCs did not significantly change (**Fig. 2h**). This suggests  
137 that the NEO1<sup>+</sup> fraction selectively expands among *Hoxb5*<sup>+</sup> LT-HSCs in the bone marrow, while  
138 the number of NEO1<sup>-</sup> *Hoxb5*<sup>+</sup> LT-HSCs remains stable with age.  
139

140 We next evaluated the response of *Hoxb5*<sup>+</sup> LT-HSCs and the NEO1<sup>+</sup> and NEO1<sup>-</sup>  
141 subpopulations to myeloablative stress. 4-month-old adult mice were treated with 150 mg/kg 5-  
142 fluorouracil (5-FU) and their bone marrow was analyzed 5 days post-treatment when HSC  
143 proliferation is maximum<sup>40</sup> (**Fig. 2i**). While the frequency of *Hoxb5*<sup>+</sup> and *Hoxb5*<sup>-</sup> cells among  
144 pHSCs did not change (**Fig. 2j**), a significantly higher percentage of *Hoxb5*<sup>+</sup> LT-HSCs were  
145 NEO1<sup>+</sup> than NEO1<sup>-</sup> after treatment (**Fig. 2k**). This response may be due to the proliferation of  
146 NEO1<sup>+</sup>*Hoxb5*<sup>+</sup> LT-HSCs, differentiation of NEO1<sup>-</sup> *Hoxb5*<sup>+</sup> to NEO1<sup>+</sup>*Hoxb5*<sup>+</sup>, or a combination of  
147 the two.

#### 148 149 **NEO1<sup>+</sup>*Hoxb5*<sup>+</sup> LT-HSCs are more proliferative than NEO1<sup>-</sup>*Hoxb5*<sup>+</sup> LT-HSCs in young and** 150 **old mice**

151 We next asked whether the difference in expansion of NEO1<sup>+</sup> versus NEO1<sup>-</sup>*Hoxb5*<sup>+</sup> LT-HSCs  
152 during aging and in response to myeloablative stress can be partially explained by differences in  
153 proliferation<sup>41</sup>. To address this, we measured the percent of each cell population in G<sub>0</sub>, G<sub>1</sub>, and  
154 G<sub>2</sub>/S by KI-67 and DAPI staining at both 2-to-3 months and 12-to-14 months of age (**Fig. 3;**  
155 **Supplementary Fig. 4**). Consistent with previous reports<sup>42</sup>, 12-to-14-month-old HSCs were  
156 more often in G<sub>0</sub> compared to 2-to-3-month-old HSCs, suggesting increased exhaustion and  
157 quiescence with age in the absence of leukemia (**Fig. 3; Supplementary Fig. 4**). In support of  
158 the limited expansion of *Hoxb5*<sup>+</sup> LT-HSCs among pHSCs with age, we did not observe  
159 significant differences in G<sub>0</sub>, G<sub>1</sub>, or G<sub>2</sub>/S status between *Hoxb5*<sup>+</sup> LT-HSCs and *Hoxb5*<sup>-</sup> ST-HSCs  
160 (**Fig. 3a-c; Supplementary Fig. 4**). NEO1<sup>+</sup> and NEO1<sup>-</sup>*Hoxb5*<sup>+</sup> LT-HSCs also did not differ in  
161 the proportion of G<sub>0</sub> cells in both 2-to-3-month-old and 12-to-14-month-old bone marrow (**Fig.**  
162 **3d; Supplementary Fig. 4**).

163  
164 However, NEO1<sup>+</sup>*Hoxb5*<sup>+</sup> LT-HSCs were significantly more often in G<sub>2</sub>/S compared to NEO1<sup>-</sup>  
165 *Hoxb5*<sup>+</sup>LT-HSCs in both young and old bone marrow (**Fig. 3f; Supplementary Fig. 4**).  
166 Moreover, in the young bone marrow, there was a significantly smaller percentage of  
167 NEO1<sup>+</sup>*Hoxb5*<sup>+</sup> LT-HSCs in G<sub>1</sub> compared to NEO1<sup>-</sup>*Hoxb5*<sup>+</sup> LT-HSCs (**Fig. 3e; Supplementary**  
168 **Fig. 4**). Taken together, this suggests that NEO1<sup>+</sup>*Hoxb5*<sup>+</sup> LT-HSCs are more proliferative, which  
169 may partially contribute to their selective expansion during aging and in response to  
170 myeloablative stress.

#### 171 172 **Neogenin-1 marks a less regenerative, myeloid-biased fraction of *Hoxb5*<sup>+</sup> LT-HSCs**

173 Given the aging and cell cycle differences between NEO1<sup>+</sup> and NEO1<sup>-</sup>*Hoxb5*<sup>+</sup> LT-HSCs, we  
174 next evaluated their reconstitution potential and lineage output by 10-cell transplants into  
175 congenic irradiated primary recipients (**Fig. 4a**). Over the course of 16 weeks, the percent of  
176 total chimerism among peripheral blood that was donor-derived, was similar between NEO1<sup>+</sup>  
177 and NEO1<sup>-</sup>*Hoxb5*<sup>+</sup> LT-HSC transplants (**Fig. 4b**). However, among all donor-derived peripheral  
178 blood, NEO1<sup>+</sup>*Hoxb5*<sup>+</sup> LT-HSCs gave rise to a higher percentage of granulocytes and monocytes  
179 (myeloid) and lower percentage of B and T cells (lymphoid) compared to NEO1<sup>-</sup>*Hoxb5*<sup>+</sup> LT-  
180 HSCs (**Fig. 4c,d**).

181  
182 To evaluate the long-term reconstitution potential and the stability of lineage bias, we serially  
183 transplanted 1000 donor-derived Lin<sup>-</sup>c-KIT<sup>+</sup>SCA1<sup>+</sup> (KLS) cells from primary recipients into  
184 congenic irradiated secondary hosts (**Fig. 4a**). Although KLS cells from both donors repopulated  
185 all major lineages in secondary hosts, NEO1<sup>-</sup>*Hoxb5*<sup>+</sup>-derived cells exhibited significantly higher  
186 reconstitution compared to NEO1<sup>+</sup>*Hoxb5*<sup>+</sup>-derived cells (**Fig. 4e**). Moreover, as during primary  
187 transplant, NEO1<sup>+</sup>*Hoxb5*<sup>+</sup>-derived cells maintained significant bias towards granulocytes and  
188 monocytes and away from B and T cells compared to NEO1<sup>-</sup>*Hoxb5*<sup>+</sup>-derived cells. (**Fig. 4f,g**).  
189 This suggests that both myeloid-biased and balanced phenotypes are long-term maintained on  
190 secondary transplantation.



## 191 **Transcriptional programs recapitulate functional differences between NEO1<sup>+</sup> and NEO1<sup>-</sup>** 192 ***Hoxb5*<sup>+</sup> LT-HSCs**

193 We next sought to understand the transcriptional programs that drive the observed functional  
194 differences between NEO1<sup>+</sup>*Hoxb5*<sup>+</sup> and NEO1<sup>-</sup>*Hoxb5*<sup>+</sup> LT-HSCs. We isolated 250-500  
195 NEO1<sup>+</sup>*Hoxb5*<sup>+</sup> and NEO1<sup>-</sup>*Hoxb5*<sup>+</sup> cells from female, 8-to-12-week old *Hoxb5*-mCherry mice and  
196 performed low-input full-length RNA-sequencing using the Smart-Seq2 protocol<sup>43</sup> (**Fig. 5a**).  
197 Paired gene expression comparison of the two populations identified 1,036 differentially  
198 expressed genes (false discovery rate *P*-adjusted < 0.1; **Fig. 5b**; **Supplementary Fig. 5a**;  
199 **Supplementary Table 2**)<sup>44</sup>. Genes implicated in activation, cell cycle, and differentiation, such  
200 as *Fanca*, *Fancb*, and *Mycn*<sup>45,46</sup> were enriched in NEO1<sup>+</sup>*Hoxb5*<sup>+</sup> LT-HSCs, while genes involved  
201 in anti-redox, e.g. *Sod1*<sup>47</sup>, and regulation of stem cell potency, e.g. *Klf4* and *Malat1*<sup>48,49</sup> were  
202 enriched in NEO1<sup>-</sup>*Hoxb5*<sup>+</sup> LT-HSCs (**Fig. 5b**). Gene set enrichment analysis (GSEA)<sup>50</sup> and  
203 hypergeometric test with gene ontology (GO): biological processes<sup>51,52</sup> revealed that the driving  
204 differences (FDR < 0.05, P value < 0.05) between NEO1<sup>+</sup> and NEO1<sup>-</sup> cells were cell cycle and  
205 ribosomal RNA expression (**Fig. 5c**; **Supplementary Fig. 5b**).  
206

207 We also searched for the expression of lineage-specific transcripts that may indicate signs of  
208 early myeloid and lymphoid priming in LT-HSCs. Among the genes significantly enriched in  
209 NEO1<sup>+</sup> compared to NEO1<sup>-</sup>*Hoxb5*<sup>+</sup> LT-HSCs, we found several myeloid genes, including *Lrg1*  
210 and lineage-related transcription factors, such as *Meis2*, *Hoxb6*, and *Cebpe* (**Fig. 5e**), and  
211 platelet genes (**Fig. 5f**), such as *Vwf*, *Clu*, and *Selp*. We also find that NEO1<sup>+</sup> LT-HSCs are  
212 significantly enriched (*Q* < 0.05) for previously reported gene signatures of megakaryocyte  
213 progenitors (MkP) and pre-erythrocyte colony-forming units (preCFU-E)(**Supplementary Fig.**  
214 **5c**)<sup>26</sup>. Moreover, the gene expression signature of NEO1<sup>+</sup>*Hoxb5*<sup>+</sup> LT-HSCs significantly aligned  
215 with expression profiles of previously reported myeloid-biased LT-HSCs (**Fig. 5d, top**), while  
216 NEO1<sup>-</sup> LT-HSCs were enriched for the balanced LT-HSC signature (**Fig. 5d, bottom**).  
217 Altogether, these data suggest that LT-HSCs may sample regions of the transcriptome  
218 associated with their lineage fate decisions.  
219

220 Finally, we also compared NEO1<sup>+</sup> and NEO1<sup>-</sup>*Hoxb5*<sup>+</sup> LT-HSC gene expression with respect to  
221 known stemness-associated genes. Overall, NEO1<sup>+</sup>*Hoxb5*<sup>+</sup> LT-HSCs had higher expression of  
222 known stem-related genes, including *Cttnal1*<sup>9</sup>, *Fgd5*<sup>7</sup>, *Bmi1*<sup>53</sup>, *Gprc5c*<sup>38</sup>, and *Slamf1*<sup>5</sup> (**Fig. 5g**),  
223 the latter of which was confirmed by flow cytometry (**Supplementary Fig. 6**). This suggests that  
224 although previously identified stemness genes enrich for a self-renewing phenotype, their  
225 expression may also be associated with myeloid-bias.  
226

## 227 **Lineage-balanced NEO1<sup>-</sup>*Hoxb5*<sup>+</sup> LT-HSCs outcompete NEO1<sup>+</sup>*Hoxb5*<sup>+</sup> LT-HSCs in** 228 **reconstitution and reside at the apex of hematopoiesis**

229 To directly compare the relative fitness of NEO1<sup>+</sup>*Hoxb5*<sup>+</sup> LT-HSCs and NEO1<sup>-</sup>*Hoxb5*<sup>+</sup> LT-HSCs,  
230 we co-transplanted 200 cells from each fraction with host supporter cells into irradiated 2-to-3-  
231 month-old congenic recipients (**Fig. 6a**). Donor origin was distinguished by CD45.2 and EGFP  
232 expression using *Hoxb5*-mCherry and *CAG*-EGFP;*Hoxb5*-mCherry mice (**Fig. 6a**). Unlike the  
233 primary transplants above, NEO1<sup>-</sup>*Hoxb5*<sup>+</sup> LT-HSCs exhibited significantly higher reconstitution  
234 potential compared to NEO1<sup>+</sup>*Hoxb5*<sup>+</sup> LT-HSCs in the competitive setting (**Fig. 6b**). This  
235 suggests that NEO1<sup>-</sup>*Hoxb5*<sup>+</sup> LT-HSCs are more fit to reconstitute young recipients compared to  
236 NEO1<sup>+</sup>*Hoxb5*<sup>+</sup> LT-HSCs.  
237

238 Competitive transplants also confirmed that NEO1<sup>+</sup>*Hoxb5*<sup>+</sup> LT-HSCs contribute significantly  
239 more to granulocytes and monocytes (myeloid) and less to B and T cells (lymphoid) compared  
240 to NEO1<sup>-</sup>*Hoxb5*<sup>+</sup> LT-HSCs (**Fig. 6c,d**). We also quantified platelet fractions among EGFP<sup>+</sup>  
241 donors. Relative platelet contribution from NEO1<sup>+</sup>*Hoxb5*<sup>+</sup> was not significantly different from

242 NEO1<sup>-</sup>*Hoxb5*<sup>+</sup> donors during the first 16 weeks post-transplant, but significantly increased  
243 among NEO1<sup>+</sup>*Hoxb5*<sup>+</sup>-derived PB at 20 weeks post-transplant (**Fig. 6e**).

244  
245 Finally, we also measured the composition of LT-HSCs between NEO1<sup>+</sup> and NEO1<sup>-</sup> derived  
246 bone marrow in the competitive setting. Both NEO1<sup>+</sup> and NEO1<sup>-</sup>*Hoxb5*<sup>+</sup> cells produced on  
247 average equal numbers of *Hoxb5*<sup>+</sup> LT-HSCs per million bone marrow cells (**Supplementary**  
248 **Fig. 7**), and among *Hoxb5*<sup>+</sup> LT-HSCs, more NEO1<sup>+</sup> than NEO1<sup>-</sup>*Hoxb5*<sup>+</sup> cells (**Fig. 6f**). However,  
249 NEO1<sup>+</sup>*Hoxb5*<sup>+</sup> cells produced significantly fewer NEO1<sup>-</sup>*Hoxb5*<sup>+</sup> cells compared to NEO1<sup>-</sup>  
250 *Hoxb5*<sup>+</sup> cells ( $P = 0.006$ ). This suggests limited transition from NEO1<sup>+</sup> to NEO1<sup>-</sup>, while NEO1<sup>-</sup>  
251 *Hoxb5*<sup>+</sup> cells are capable of giving rise to high percentages of both populations (**Fig. 6f**).  
252 Therefore, NEO1<sup>-</sup>*Hoxb5*<sup>+</sup> LT-HSCs likely precede NEO1<sup>+</sup>*Hoxb5*<sup>+</sup> LT-HSCs in the differentiation  
253 hierarchy (**Fig. 6g**).

## 254 DISCUSSION

255  
256 Previously, we identified *Hoxb5* as a marker of functional long-term repopulating HSCs (LT-  
257 HSCs)<sup>8</sup>. This has allowed us to distinguish LT-HSCs from downstream progenitors that display  
258 the same surface phenotype but lack the ability to self-renew. Although *Hoxb5*<sup>+</sup> LT-HSCs are  
259 long-term self-renewing cells, it is unknown whether they contain fractions with distinct  
260 functional properties. Increasing evidence suggests that subpopulations of LT-HSCs selectively  
261 respond to environmental stress conditions<sup>18,19</sup> and exhibit biases in lineage contribution<sup>18</sup>.  
262 Moreover, the selective and clonal expansion of a subset of LT-HSCs has been proposed to  
263 mediate the changes observed in hematopoiesis during aging<sup>15,54</sup>. Therefore, characterizing the  
264 heterogeneity within functional *Hoxb5*<sup>+</sup> LT-HSCs is critical to understand stem cell heterogeneity  
265 and selective cellular responses to stress and aging.

266  
267 In this study, we screened gene expression profiles for candidate surface markers that are strictly  
268 enriched in HSCs and stratify LT-HSCs into subpopulations. We identified Neogenin-1 (*Neo1*;  
269 NEO1) as a transmembrane receptor specifically expressed on a sub-fraction of *Hoxb5*<sup>+</sup> LT-  
270 HSCs. Although NEO1 is well known for its role in the brain<sup>28-30</sup>, skeletal muscle<sup>31</sup>, breast  
271 epithelia<sup>33</sup>, endothelia<sup>34</sup>, and other tissues<sup>32</sup>, its function in the bone marrow and association with  
272 LT-HSCs has remained poorly understood. We find that NEO1<sup>+</sup> cells comprise a minor fraction of  
273 *Hoxb5*<sup>+</sup> LT-HSCs in young mice that progressively expands with age and represents >80% of 22-  
274 month-old *Hoxb5*<sup>+</sup> LT-HSCs. This expansion can be partially explained by the higher frequency  
275 of NEO1<sup>+</sup>*Hoxb5*<sup>+</sup> in the G<sub>2</sub>/S cell cycle phase compared to NEO1<sup>-</sup>*Hoxb5*<sup>+</sup> LT-HSCs. Both NEO1<sup>+</sup>  
276 and NEO1<sup>-</sup>*Hoxb5*<sup>+</sup> LT-HSCs are long-term self-renewing and contribute to all major blood  
277 lineages during primary and secondary transplantations into irradiated mice. However,  
278 NEO1<sup>+</sup>*Hoxb5*<sup>+</sup> LT-HSCs exhibit a stable bias towards myeloid lineages and are less productive  
279 in secondary transplants compared to NEO1<sup>-</sup>*Hoxb5*<sup>+</sup> LT-HSCs. Gene expression comparison of  
280 NEO1<sup>+</sup> and NEO1<sup>-</sup> LT-HSCs further suggests early sampling of myeloid- and platelet-related  
281 genes, including lineage-related transcription factors, at the transcript-level.

282  
283 Several previous studies have used single cell transplants to describe HSC heterogeneity and  
284 the existence of different lineage-primed states. Single cell HSC transplants by Dykstra and  
285 colleagues described two fractions of long-term self-renewing HSCs, 'α cells' and 'β cells', which  
286 were myeloid-biased and lineage-balanced, respectively<sup>22</sup>. Yamamoto and colleagues also have  
287 demonstrated the presence of myeloid-restricted progenitors with long-term repopulating activity  
288 (MyRPs) that are derived directly from balanced HSCs and expand with age<sup>23,24</sup>. While single  
289 HSC transplants evidenced the presence of balanced and myeloid-biased LT-HSCs, these  
290 studies did not identify surface or transcriptional markers to distinguish these populations. We  
291 have demonstrated a precise and specific strategy for the prospective isolation of balanced and  
292 myeloid-biased LT-HSCs using Neogenin-1 and *Hoxb5*. The functional potential of NEO1<sup>+</sup> and  
293 NEO1<sup>-</sup>*Hoxb5*<sup>+</sup> LT-HSCs matches the characteristics of the myeloid-biased and balanced LT-  
294 HSC fractions previously predicted by single cell transplants<sup>22-24</sup>.

295  
296 Other markers have also been proposed to enrich for myeloid-biased HSCs. For example, our  
297 group previously showed that high CD150 surface expression enriches for myeloid-biased  
298 HSCs<sup>15</sup>. However, the association of CD150 with myeloid-bias was not evaluated in long-term  
299 repopulating cells and additional marker combinations can improve the purification of balanced  
300 from myeloid-biased HSCs. Nevertheless, *Hoxb5*<sup>+</sup>NEO1<sup>+</sup> LT-HSCs indeed express higher  
301 CD150 (**Supplementary Fig. 6**), validating our initial attempts to prospectively isolate myeloid-  
302 biased HSCs<sup>15</sup>. CD41 has also been suggested to mark myelo-erythroid HSCs<sup>25</sup>, although it  
303 likely separates different fractions. CD41<sup>-</sup> HSCs are lymphoid biased and proliferative, while  
304 NEO1<sup>-</sup>*Hoxb5*<sup>+</sup>HSCs are balanced and quiescent. The vWF reporter mouse is another system



305 used to isolate platelet-biased and myeloid-biased HSCs <sup>26</sup>. However, like the CD41<sup>-</sup> HSCs,  
306 vWF<sup>-</sup> HSCs are lymphoid-biased HSCs that are phenotypically distinct from the balanced,  
307 quiescent NEO1<sup>-</sup>*Hoxb5*<sup>+</sup> cells we describe in this study. Finally, CD61 was recently described  
308 as a surface marker on long-term repopulating myeloid-biased LT-HSCs that respond to  
309 inflammatory stress and expand with age<sup>18</sup>. The CD61<sup>+</sup> and CD61<sup>-</sup> LT-HSCs are  
310 transcriptionally similar to NEO1<sup>+</sup> and NEO1<sup>-</sup>*Hoxb5*<sup>+</sup> LT-HSCs, suggesting that these markers  
311 may capture similar cell types (**Fig 5e,f**). Leveraging combinations of both surface markers will  
312 likely improve the purification of balanced LT-HSCs from lineage-biased LT-HSCs.

313  
314 Our results also bring to question the hierarchical relationship between lineage-primed and  
315 balanced LT-HSCs. Previous single cell transplants studies suggest some degree of plasticity  
316 between LT-HSC fractions with different differentiation potentials<sup>22</sup>. Our competitive transplants  
317 indicate that NEO1<sup>-</sup>*Hoxb5*<sup>+</sup> LT-HSCs are likely upstream of NEO1<sup>+</sup>*Hoxb5*<sup>+</sup> LT-HSCs, as NEO1<sup>-</sup>  
318 *Hoxb5*<sup>+</sup> LT-HSCs produced NEO1<sup>+</sup> *Hoxb5*<sup>+</sup> LT-HSCs, while conversion of NEO1<sup>+</sup> *Hoxb5*<sup>+</sup> LT-  
319 HSCs to NEO1<sup>-</sup>*Hoxb5*<sup>+</sup> HSCs was rare. The few instances of NEO1<sup>+</sup> donors producing NEO1<sup>-</sup>  
320 *Hoxb5*<sup>+</sup> LT-HSCs may be attributable to impurity among the 200 cells that were injected. This is  
321 also consistent with our gene expression and cell cycle analysis demonstrating that NEO1<sup>+</sup>*Hoxb5*<sup>+</sup>  
322 LT-HSCs are more often cycling compared to NEO1<sup>-</sup>*Hoxb5*<sup>+</sup> cells<sup>55</sup>. Moreover, NEO1<sup>-</sup>*Hoxb5*<sup>+</sup> LT-  
323 HSCs contributed more to total hematopoiesis in secondary transplants and competitive  
324 transplants compared to NEO1<sup>+</sup>*Hoxb5*<sup>+</sup> LT-HSCs. Therefore, our data suggest that balanced  
325 quiescent LT-HSCs reside at the apex of the hematopoietic hierarchy, corroborating a recent  
326 study showing that myeloid-biased MyRPs are derived from balanced HSCs<sup>23,24</sup>. However, this  
327 contrasts with the view that vWF<sup>+</sup> and CD41<sup>+</sup> platelet/myeloid-biased cells reside at the apex of  
328 the hematopoietic hierarchy<sup>25,26</sup>.

329  
330 Additional work will also be required to delineate the differentiation path that distinct LT-HSC  
331 fractions follow to generate various blood cells. Our study suggests that balanced NEO1<sup>-</sup>*Hoxb5*<sup>+</sup>  
332 LT-HSCs contribute to myeloid lineage through a NEO1<sup>+</sup>*Hoxb5*<sup>+</sup> LT-HSC intermediate. However,  
333 it is unclear whether NEO1<sup>-</sup>*Hoxb5*<sup>+</sup> LT-HSCs require the NEO1<sup>+</sup>*Hoxb5*<sup>+</sup> intermediate state or can  
334 independently produce lineage progenitors through alternative routes. Moreover, it remains to be  
335 answered whether all NEO1<sup>+</sup>*Hoxb5*<sup>+</sup> LT-HSCs are derived from NEO1<sup>-</sup>*Hoxb5*<sup>+</sup> LT-HSCs. To fully  
336 reveal the hierarchical order and sequence of differentiation events, single cell tracking  
337 experiments will be required. Critically, our experimental results are based on the behavior of cells  
338 upon transplantation into young, irradiated mice. A recent study using individually barcoded HSCs  
339 showed that lineage biases are more pronounced after transplantation into lethally irradiated mice  
340 compared to unirradiated or anti-c-KIT-depleted syngeneic mice<sup>20</sup>. This suggests that post-  
341 transplant lineage bias may be either due to plasticity in lineage output or the selective  
342 engraftment of pre-existing HSC subsets. Therefore, it will be important to evaluate the potential  
343 and hierarchical relationship between NEO1<sup>+</sup> and NEO1<sup>-</sup> *Hoxb5*<sup>+</sup> LT-HSCs during *in situ*,  
344 unperturbed hematopoiesis with *in vivo* lineage tracing.

345  
346 Additionally, we note that the isolation of these populations requires the *Hoxb5*-mCherry reporter  
347 mice to label LT-HSCs. While NEO1 expression is restricted to phenotypic HSCs (KLS CD150<sup>+</sup>  
348 CD48<sup>-</sup> FLK2<sup>-</sup> CD34<sup>-</sup>) and is further enriched in *Hoxb5*<sup>+</sup> LT-HSCs, the population of NEO1<sup>-</sup>*Hoxb5*<sup>-</sup>  
349 ST-HSCs far outnumber the balanced NEO1<sup>-</sup>*Hoxb5*<sup>+</sup> population. Therefore, comparing NEO1<sup>+</sup>  
350 and NEO1<sup>-</sup> fractions within pHSCs without gating *Hoxb5*<sup>+</sup> LT-HSCs may mislead the significance  
351 of NEO1 to separate myeloid-biased from balanced cells, especially as NEO1 expression is  
352 associated with the expression of other pHSC-specific markers.

353  
354 The functional differences between NEO1<sup>+</sup> and NEO1<sup>-</sup> *Hoxb5*<sup>+</sup> LT-HSCs may be influenced by  
355 intrinsic programs, external cues, or both. As NEO1 is a receptor to many known ligands, several

356 of which are expressed by mesenchymal and endothelial cells of the bone marrow (data not  
357 shown), ongoing studies are evaluating the role of the bone marrow niche and particular ligands  
358 to NEO1 in influencing lineage bias and stem cell maintenance.

359  
360 Finally, our antibody against NEO1 also identified higher proportions of cells in human HSCs  
361 compared to MPPs, LMPPs, and downstream progenitors, suggesting a possibly conserved role  
362 of NEO1 in human HSC biology. Therefore, further evaluation of NEO1<sup>+</sup>*Hoxb5*<sup>+</sup> LT-HSCs and the  
363 receptor-ligand interactions may offer insights into evolutionarily conserved mechanisms of  
364 lineage bias during long-term hematopoiesis.

365  
366 Taken together, we have identified a novel marker on the surface of *Hoxb5*<sup>+</sup> LT-HSCs, Neogenin-  
367 1, that enables the separation of myeloid-biased LT-HSCs from quiescent, balanced LT-HSCs  
368 with the highest long-term repopulation potential. Our findings reveal a previously undescribed  
369 layer of functional heterogeneity among strictly defined functional LT-HSCs and enable the  
370 precise and prospective study of LT-HSCs and their fractions.

## 371 MATERIALS AND METHODS

372

### 373 Mice

374 2-to-3-month-old female *Hoxb5*-mCherry mice (MGI:5911679) were used as donors (CD45.2)  
375 for transplant experiments and bulk RNA-sequencing. Additionally, 2-to-3-month-old *CAG-*  
376 *EGFP*;*Hoxb5*-mCherry mice (in-house colony) were used for competitive transplant assays. 2-  
377 to-3-month-old female B6.SJL-*Ptprca*<sup>a</sup> *Pepcb*<sup>b</sup>/BoyJ mice (Jackson Laboratory) were used as  
378 recipients (CD45.1) for transplant experiments and for supporter bone marrow. 4-month-old  
379 female *Hoxb5*-mCherry mice were used for experiments with 5-fluorouracil. E16.5 embryos and  
380 5-month, 13-month, and 22-month-old female *Hoxb5*-mCherry mice were used for aging  
381 analysis. 2-to-3-month-old and 12-to-14-month-old female *Hoxb5*-mCherry mice were used for  
382 cell cycle analysis. 2-to-3-month-old C57BL/6J female mice (Jackson Laboratory) were used for  
383 fluorescent-minus-one (FMO) controls for *Hoxb5*-mCherry expression.

384

### 385 Gene expression profiles of mouse hematopoiesis

386 All microarray data used in this study are accessible through the Gene Expression Commons  
387 platform (<http://gexc.stanford.edu>) and the Gene Expression Omnibus (GEO) accession,  
388 GSE34723. We analyzed 64 microarray gene expression profiles (GEPs) of 23 distinct mouse  
389 hematopoietic cell types (**Supplementary Table 1**) for surface markers enriched in HSCs  
390 compared to downstream progeny. GEPs were normalized against a large common reference of  
391 >11,939 Affymetrix Mouse Genome 430 2.0 microarrays as described before<sup>35</sup>. For each gene,  
392 the probeset with the largest dynamic range was selected and transformed to percentile ranks  
393 (range: -100% to +100%) based on its relative expression to the reference.

394

395 Genes were further subset based on two main criteria (1) positive percentile expression in  
396 HSCs and (2) annotation as a cell surface protein based on GO:0009986, leaving 186 gene  
397 candidates. Fold-change enrichment in HSCs was calculated as the average percentile rank for  
398 each gene among HSCs divided by the average percentile rank for that gene across all other  
399 cells.

400

401 Single cell transcriptomes of hematopoietic stem and progenitors (HSPCs) were acquired from  
402 GEO accessions, GSE90742, and from the Single-Cell Gene Expression Atlas for  
403 hematopoietic cells ([http://blood.stemcells.cam.ac.uk/single\\_cell\\_atlas.html](http://blood.stemcells.cam.ac.uk/single_cell_atlas.html)). In the dataset from  
404 Rodriguez-Fraticelli et al.<sup>21</sup>, cells with greater than 0 unique molecular identifiers (UMIs) were  
405 considered *Neo1*<sup>+</sup>. In the dataset from Nestorowa et al.<sup>56</sup>, cells with greater than 4 log<sub>2</sub> counts  
406 were considered *Neo1*<sup>+</sup>. A threshold of 4 was chosen based on the color gradient thresholds for  
407 the diffusion maps in the Single-Cell Gene Expression Atlas.

408

### 409 Transplantation assays

410 2-to-3-month-old female B6.SJL-*Ptprca*<sup>a</sup> *Pepcb*<sup>b</sup>/BoyJ (CD45.1) recipient mice were lethally  
411 irradiated at a single dose of 9 Gy. For reconstitution assays, 10 NEO1<sup>+</sup>*Hoxb5*<sup>+</sup> or NEO1<sup>-</sup>  
412 *Hoxb5*<sup>+</sup> LT-HSCs were isolated from donor CD45.2<sup>+</sup> *Hoxb5*-mCherry mice (MGI:5911679) as  
413 described in sections '*Bone marrow isolation*' and '*Flow cytometry*' and co-injected with 2x10<sup>5</sup>  
414 recipient whole bone marrow cells in 200 µl of PBS with 2% FBS into the retro-orbital venous  
415 plexus. For secondary transplants, 1000 CD45.2<sup>+</sup> Lin<sup>-</sup>cKIT<sup>+</sup>SCA1<sup>+</sup> (KLS) cells were isolated by  
416 flow cytometry and transplanted together with 2 x 10<sup>5</sup> recipient (CD45.1) whole bone marrow  
417 cells into lethally irradiated recipient CD45.1<sup>+</sup> mice as described above.

418

419 For competitive assays, 200 NEO1<sup>+</sup> and NEO1<sup>-</sup>*Hoxb5*<sup>+</sup> LT-HSCs were isolated from either  
420 CD45.2<sup>+</sup> *Hoxb5*-mCherry mice (MGI:5911679) or an in-house strain of EGFP<sup>+</sup>CD45.2<sup>+</sup> *Hoxb5*-  
421 mCherry mice and transplanted into lethally irradiated recipient CD45.1<sup>+</sup> mice at a split dose of

422 9 Gy with a 4-hour interval, controlling for donor strain biases by transplanting the same  
423 condition from both strains.

424

#### 425 **Peripheral blood analysis for chimerism**

426 Peripheral blood collections for assessment of donor chimerism were performed at 4, 8, 12, and  
427 16 weeks after primary and secondary transplantations and 8, 12, 16, and 20 weeks after  
428 competitive transplantations. At each time point, 50-100  $\mu$ l of blood was collected from the retro-  
429 orbital venous plexus using heparinized capillary tubes (Fisher Scientific) and added to  
430 K<sub>2</sub>/EDTA-coated MiniCollect tubes (Greiner Bio-One). Red blood cells were depleted with two  
431 rounds of ACK lysis buffer by incubating at RT for 5 min each. Cells were then washed with cold  
432 PBS. Cells were Fc-blocked with of rat IgG (LifeSpan BioSciences) and stained with 5  $\mu$ g/ml of  
433 rat anti-mouse antibodies (catalog no., concentrations, and clone provided in **Supplementary**  
434 **Table 3**) to CD45.1, CD45.2, CD11B, GR1, B220, CD3, and only in the competitive assay,  
435 CD41. 7-Aminoactinomycin D (7-AAD; BD Bioscience) was added for live and dead cell  
436 discrimination.

437

438 For reconstitution assays, total donor chimerism was defined as the percentage of CD45.1<sup>-</sup>  
439 CD45.2<sup>+</sup> cells among total CD45.1<sup>-</sup>CD45.2<sup>+</sup> and CD45.1<sup>+</sup>CD45.2<sup>-</sup> cells. For competitive assays,  
440 total donor chimerism was defined as the percentage of either CD45.1<sup>-</sup>CD45.2<sup>+</sup>EGFP<sup>-</sup> cells or  
441 CD45.1<sup>-</sup>CD45.2<sup>+</sup>EGFP<sup>+</sup> cells among total CD45.1<sup>-</sup>CD45.2<sup>+</sup>EGFP<sup>-</sup>, CD45.1<sup>-</sup>CD45.2<sup>+</sup>EGFP<sup>+</sup>,  
442 and CD45.1<sup>+</sup>CD45.2<sup>-</sup>EGFP<sup>-</sup> cells. For all cases, lineage chimerism was evaluated as the  
443 percentage of lymphoid (B220<sup>+</sup> B cells and CD3<sup>+</sup> T cells) or myeloid (GR1<sup>+</sup>CD11B<sup>+</sup> granulocytes  
444 and monocytes among donor-derived cells. Only EGFP<sup>+</sup> cells were evaluated for platelet  
445 chimerism. In these cases, platelet chimerism was calculated as the percent of CD41<sup>+</sup> platelets  
446 among all donor-derived EGFP<sup>+</sup> cells and platelets.

447

#### 448 **Mouse hematopoietic stem cell isolation by flow cytometry**

449 HSCs were isolated from 2-to-3-month-old, 5-month-old, 13-month-old, and 22-month-old bone  
450 marrow and E16.5 fetal liver of *Hoxb5*-mCherry mice (MGI:5911679). For bone marrow  
451 isolation, tibia, femur, and pelvis were dissected, crushed with mortar and pestle in FACS buffer  
452 (2% fetal bovine serum (FBS) in PBS with 100 U/ml DNase), and the supernatant was collected.  
453 For WBM isolation, red blood cells were depleted with ACK lysis buffer by incubating at RT for  
454 10 min and Fc-blocked by incubating with rat IgG (LifeSpan BioSciences) for 10 min. For c-KIT<sup>+</sup>  
455 cell isolation, samples were Fc-blocked with rat IgG for 10 min, incubated in c-KIT magnetic  
456 beads (Miltenyi) with 100 U/ml DNase, and MACS-isolated using LS magnetic columns  
457 (Miltenyi) as per manufacturer's protocol. For the cell cycle analysis, samples were blocked with  
458 TruStain FcX (CD16/32) instead of rat IgG, and enriched for c-KIT<sup>+</sup> cells. Each sample was  
459 normalized to an equal number of cells (4.5 million c-KIT<sup>+</sup> cells) and processed following a  
460 previously published protocol for cell cycle analysis of HSCs<sup>57</sup>.

461

462 To isolate HSCs from E16.5 fetal liver, fetal livers were dissected from 6-8 embryos of pregnant  
463 mothers as previously described<sup>58</sup> and single-cell suspensions were prepared by gently  
464 crushing the tissue through a 40- $\mu$ m nylon mesh using a syringe plunger. Samples were RBC-  
465 depleted and Fc-blocked as described above.

466

467 Samples for mouse HSC isolation were stained with a cocktail of antibodies against lineage  
468 markers, i.e. CD3, Gr-1, CD11B, B220, and TER119 (AF700), c-KIT (APC-Cy7), SCA-1 (PE-  
469 Cy7), CD48 (BV711), FLK2 (PerCP-Cy5.5), CD150 (BV421), CD34 (primary: biotin; secondary:  
470 Strep-BUV737), and NEO-1 (primary: goat anti-mouse/human (R&D cat. No. AF1079);  
471 secondary: donkey anti-goat IgG (H+L) cross-absorbed AF488-conjugated; negative control:  
472 normal goat IgG). For fetal liver HSC isolation, the anti-CD11B antibody was removed from the

473 lineage panel and placed in a different channel. Primary and secondary antibody incubations  
474 were 20-30 min each with 5 min wash step in between. Catalog number, concentrations, and  
475 clone information are provided in **Supplementary Table 3**.

476  
477 Flow cytometry and cell sorting were performed on the BD FACSAria and BD LSRFortessa.  
478 Gating strategy for the different populations is shown in **Supplementary Figure 2**. 7-AAD or  
479 DAPI were used as a viability dye for dead cell exclusion, depending on the assay. All cells  
480 were suspended in FACS buffer (2% FBS in PBS) on ice unless otherwise indicated.

#### 481 482 **Myeloablative stress with 5-fluorouracil (5-FU)**

483 4-month-old female *Hoxb5*-mCherry mice were injected with 150 mg of 5-FU (Sigma-Aldrich)  
484 per kg body weight from a stock solution of 10 mg/ml in PBS<sup>40</sup>. Bone marrow populations were  
485 isolated and analyzed 5 days after treatment as described above. Notably, given the  
486 upregulation of CD11B in HSCs post-treatment with 5-FU<sup>40</sup>, the antibody to CD11B was omitted  
487 from the lineage staining panel.

#### 488 489 **Human hematopoietic stem cells**

490 Normal human CD34<sup>+</sup> bone marrow cells were purchased from AllCells, Inc and their use were  
491 approved by the Stanford University Institutional Review Boards. To analyze human  
492 hematopoietic stem cell and progenitor populations, CD34<sup>+</sup> bone marrow cells were stained  
493 against lineage markers, i.e. CD3, CD4, CD8, CD11B, CD14, CD19, CD20, CD56, and GPA  
494 (PE-Cy5), stem and progenitor markers, i.e. CD34 (APC-Cy7), CD38 (APC), CD45RA (BV785),  
495 and CD90 (FITC), and NEO-1 (primary: goat anti-mouse/human (R&D cat. No. AF1079);  
496 secondary: donkey anti-goat IgG (H+L) Cy3-conjugated; negative control: normal goat IgG).  
497 Propidium iodide (PI; Sigma-Aldrich) was added for live and dead cell discrimination. Catalog  
498 number, concentrations, and clone information are provided in **Supplementary Table 3**. Gating  
499 strategy for the different populations is shown in **Figure 1e**. Flow cytometry was performed as  
500 described above.

#### 501 502 **RNA sequencing**

503 For RNA-sequencing experiments, 250-500 cells from two pooled mice per sample were sorted  
504 directly into 100  $\mu$ L of lysis buffer (Buffer RL) and RNA was isolated with the Single Cell RNA  
505 Purification Kit (Norgen Biotek Corp.) according to the manufacturer's protocol. RNA quality was  
506 measured by capillary electrophoresis using the Agilent 2100 Bioanalyzer with Nano mRNA  
507 assay at the Stanford Protein and Nucleic Acid (PAN) Facility.

508  
509 Libraries were prepared using the Smart-seq2 protocol by Picelli et al., 2014 with minor  
510 modifications. Briefly, cDNA was generated by oligo-dT primed reverse transcription with MMLV  
511 reverse transcriptase (SMARTScribe, Clontech) and a locked template-switching  
512 oligonucleotide (TSO). This was followed by 18 cycles of PCR amplification using KAPA HiFi  
513 hotStart ReadyMix and ISPCR primers. Amplified cDNA was then purified using 0.7x volume  
514 Agencourt AMPure XP beads to remove smaller fragments. The resulting cDNA concentration  
515 and size distribution for each well was determined on a capillary electrophoresis-based Agilent  
516 2100 Bioanalyzer with High Sensitivity DNA chip at the Stanford PAN facility. 40 ng of cDNA  
517 was then tagmented, uniquely barcoded, and PCR enriched using the Nextera DNA Library  
518 Prep Kit (Illumina, San Diego, CA). Libraries were then pooled in equimolar amounts and  
519 purified of smaller fragments using 0.7x Agencourt AMPure XP beads. Pooled libraries were  
520 checked for quality using the Agilent Bioanalyzer with High Sensitivity DNA chip at the Stanford  
521 PAN facility. 10 samples were sequenced with 151 bp paired-end reads on a single lane of  
522 NextSeq 500 (Illumina, San Diego, CA) at the Stanford Functional Genomics Facility.

523



524 After sequencing, bcl2fastq2 v2.18 (Illumina) was used to extract the data and generate FASTQ  
525 files for each sample by using unique barcode combinations from the Nextera preparation. Raw  
526 reads were trimmed for base call quality (PHRED score  $\geq 21$ ) and for adapter sequences using  
527 Skewer v0.2.2<sup>59</sup>. Trimmed reads were then aligned to the mouse genome assembly (mm10)  
528 from UCSC (<http://genome.ucsc.edu>) using STAR v2.4 with default setting<sup>60</sup>.

529

### 530 **RNA sequencing analysis**

531 Count normalization and differential gene expression analysis was performed using the DESeq2  
532 v1.22.2 package in R<sup>44</sup>. Raw counts from STAR were inputted into a DESeqDataSet object  
533 indicating NEO1 status ('status') and mouse subject ('subject') as factors ('design = ~subject +  
534 status'). Counts were size-factor normalized using the 'DESeq' function and  $\log_2$ -transformed.  
535 Pairwise differential gene expression analysis was performed using the lfcShrink function and  
536 indicating 'type = apeglm', which applies the adaptive t prior shrinkage estimator. As  
537 recommended<sup>44</sup>, a threshold of  $P$ -adjusted  $< 0.1$  was used to define significance for differentially  
538 expressed genes (**Supplementary Table 2**).

539

540 Gene set enrichment analysis (GSEA) was performed using the GSEA software provided by the  
541 Broad Institute<sup>50</sup> and the clusterProfiler v3.10.0<sup>51</sup> and HTSanalyzer v2.34.0<sup>61</sup> packages in R.  
542 Hypergeometric test with GO: Biological Processes and dot plots in **Supplementary Figure 5**  
543 were generated using the clusterProfiler package in R. Gene expression signatures of myeloid  
544 and non-myeloid LT-HSCs were acquired from the original study by Mann et al., 2018<sup>18</sup>. Gene  
545 expression signatures of lineage-restricted progenitors, including megakaryocyte progenitors  
546 (MkP), pre-erythrocyte colony-forming units (preCFU-E), pre-granulocyte/macrophage  
547 progenitors (preGM), pre-megakaryocyte/erythrocyte progenitors (preMegE), and common  
548 lymphoid progenitors (CLP), were acquired from the original study by Sanjuan-Pla et al., 2013<sup>26</sup>.

549 **Overview of Figures and Tables**

550

551 **Main Figures:**

- 552 Figure 1 Identification of Neogenin-1 as a unique surface marker on hematopoietic stem  
553 cells (HSCs)
- 554 Figure 2 NEO1<sup>+</sup>*Hoxb5*<sup>+</sup> LT-HSCs selectively expand during aging and respond to  
555 myeloablative stress
- 556 Figure 3 Neogenin-1 marks a more proliferative fraction of LT-HSCs
- 557 Figure 4 NEO1<sup>+</sup>*Hoxb5*<sup>+</sup> LT-HSCs exhibit myeloid bias and reduced reconstitution potential  
558 upon serial transplantation
- 559 Figure 5 Distinct transcriptional signatures of NEO1<sup>+</sup> and NEO1<sup>-</sup> *Hoxb5*<sup>+</sup>LT-HSCs
- 560 Figure 6 NEO1<sup>-</sup>*Hoxb5*<sup>+</sup> LT-HSCs outcompete NEO1<sup>+</sup>*Hoxb5*<sup>+</sup> LT-HSCs in reconstitution  
561 potential and reside at the apex of the hematopoietic hierarchy

562

563 **Supplementary Figures:**

- 564 Supplementary Figure 1 Single cell RNA sequencing shows selective expression of  
565 Neogenin-1 in a subset of LT-HSCs
- 566 Supplementary Figure 2 Gating scheme for the prospective isolation of NEO1<sup>+</sup> and NEO1<sup>-</sup>  
567 *Hoxb5*<sup>+</sup> LT-HSCs by flow cytometry
- 568 Supplementary Figure 3 pHSC expansion in the bone marrow with age and NEO1  
569 expression in the mouse fetal liver
- 570 Supplementary Figure 4 Lineage contribution by single-cell colony formation assay and cell  
571 cycle analysis of NEO1<sup>+</sup> and NEO1<sup>-</sup> *Hoxb5*<sup>+</sup> LT-HSCs
- 572 Supplementary Figure 5 Enrichment of GO biological processes and lineage-restricted  
573 progenitor signatures in NEO1<sup>+</sup> and NEO1<sup>-</sup> *Hoxb5*<sup>+</sup> LT-HSC  
574 transcriptomes
- 575 Supplementary Figure 6 Association between NEO1 and CD150 in *Hoxb5*<sup>+</sup> LT-HSCs by  
576 flow cytometry
- 577 Supplementary Figure 7 Post-transplant contribution of NEO1<sup>+</sup> and NEO1<sup>-</sup> *Hoxb5*<sup>+</sup> LT-  
578 HSCs to *Hoxb5*<sup>+</sup> LT-HSCs

579

580 **Supplementary Tables:**

- 581 Supplementary Table 1 Gene expression percentiles of 64 microarray expression profiles  
582 from 23 distinct mouse hematopoietic cell types with surface  
583 marker annotations and fold enrichment values in HSCs
- 584 Supplementary Table 2 Genes differentially expressed between NEO1<sup>+</sup> and NEO1<sup>-</sup>  
585 *Hoxb5*<sup>+</sup> LT-HSCs by DESeq2
- 586 Supplementary Table 3 Inventory of antibodies and reagents

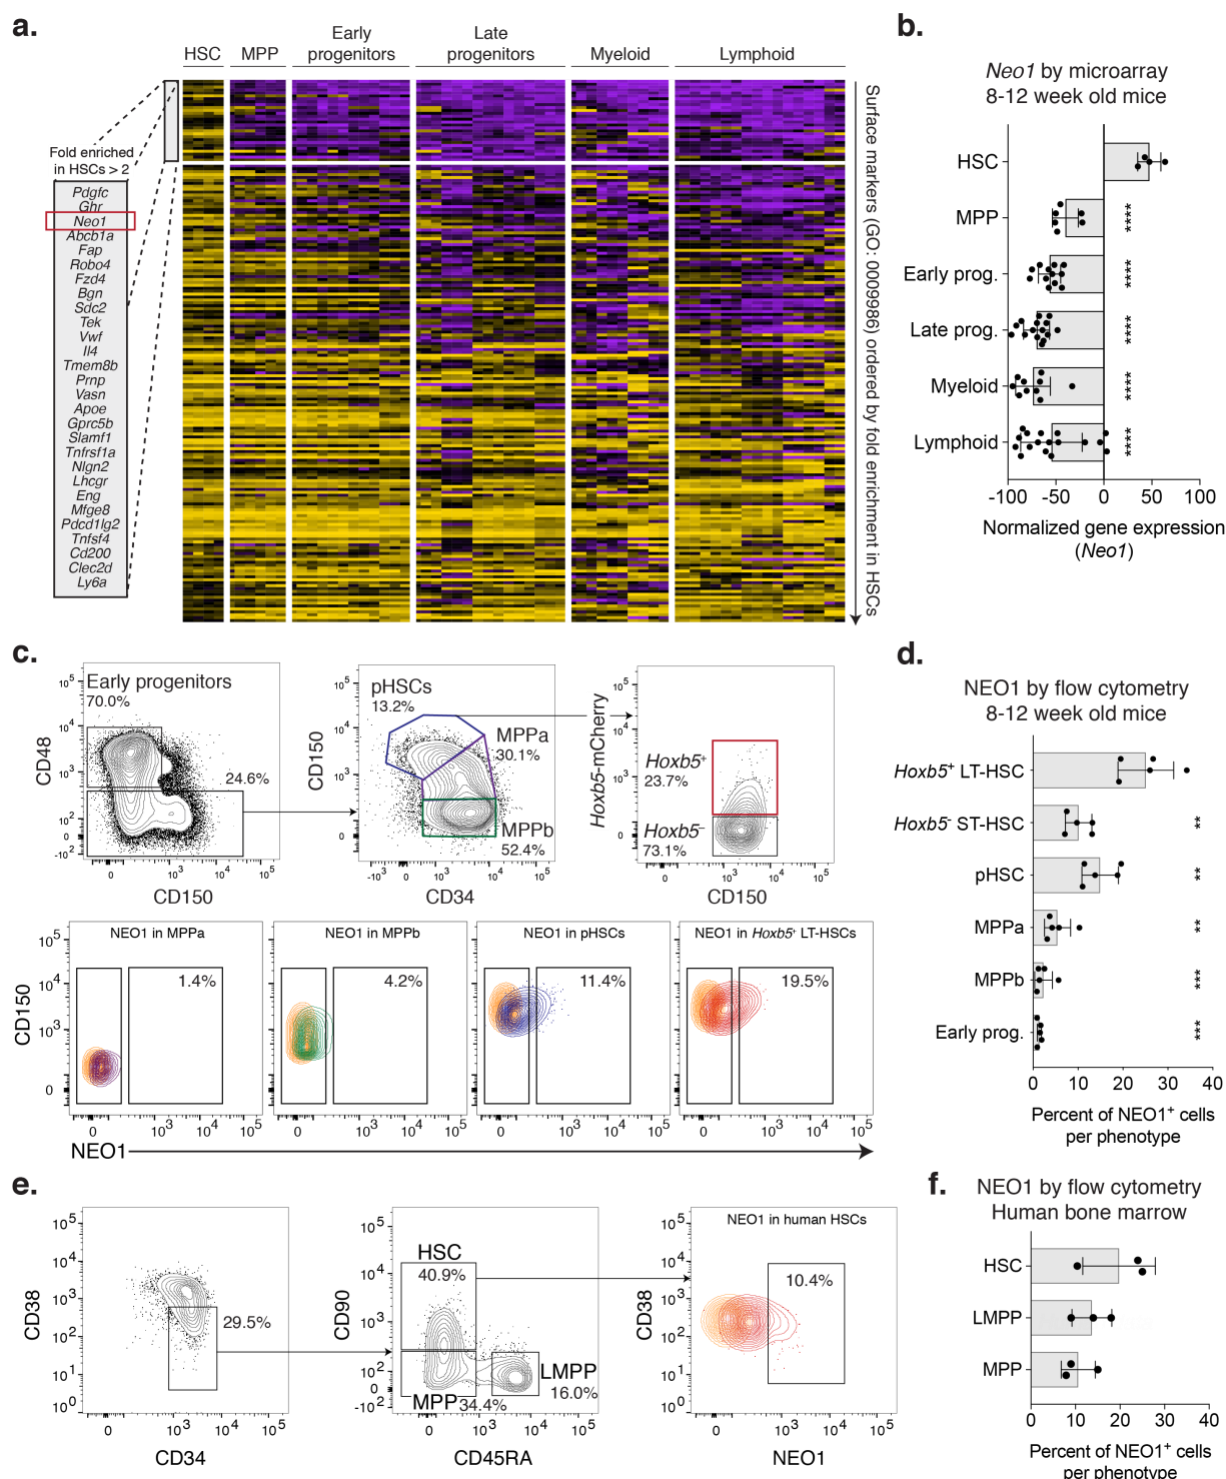

587 **Figure 1 | Identification of Neogenin-1 as a unique surface marker on hematopoietic stem**  
 588 **cells (HSCs).** (a-b) *In silico* screen to identify unique surface markers on HSCs from 64  
 589 microarray expression profiles of 23 distinct mouse hematopoietic cell types. (a) Heatmap  
 590 showing normalized gene expression of gene-ontology-annotated (GO: 0009986) surface  
 591 markers across different hematopoietic compartments. 186 surface markers expressed on  
 592 HSCs and 64 microarray expression profiles of 23 distinct mouse hematopoietic cell types  
 593 23 phenotypes categorized as 'HSCs', 'MPPs', 'Early progenitors', 'Late progenitors', 'Myeloid', and

594 'Lymphoid' are displayed (**Supplementary Table 1**). Genes are ordered from top to bottom by  
595  $\log_2$  fold enrichment in HSCs compared to downstream cells and the top most enriched genes  
596 ( $>2 \log_2$  fold enrichment) are highlighted in a box. For further details, see methods. **(b)** Barplots  
597 showing normalized gene expression of *Neo1* across the cell type categories shown in **a**.  
598 Statistical significance was calculated by unpaired, two-tailed Student's *t*-test between 'HSC'  
599 and each cell type. \*\*\*\* $P < 0.0001$ . **(c-d)** Flow cytometry analysis of NEO1 surface expression in  
600 the mouse bone marrow ( $n = 5$  mice). **(c)** Contour plots with outliers showing the gating scheme  
601 for early progenitors, MPPa, MPPb, pHSCs, and *Hoxb5*<sup>+</sup> and *Hoxb5*- LT-HSCs (top) and the  
602 corresponding surface expression of NEO1 (bottom). Colors correspond to populations shown.  
603 Goat IgG isotype control for fluorescence staining with goat anti-mouse/human NEO1 antibody  
604 is highlighted in orange (bottom). **(d)** Barplots showing the percent of NEO1<sup>+</sup> cells for each cell  
605 type gated in **c**. Statistical significance was calculated by a paired, two-tailed Student's *t*-test  
606 between '*Hoxb5*<sup>+</sup> HSC' and each cell type. \*\* $P < 0.01$ , \*\*\* $P < 0.001$ . **(e-f)** Flow cytometry  
607 analysis of NEO1 surface expression in the human bone marrow ( $n = 3$ ). **(e)** Contour plots with  
608 outliers showing the gating scheme for human HSCs, MPPs, and LMPPs. **(f)**. Barplots showing  
609 the percent of NEO1<sup>+</sup> cells for each cell type gated in **e**.

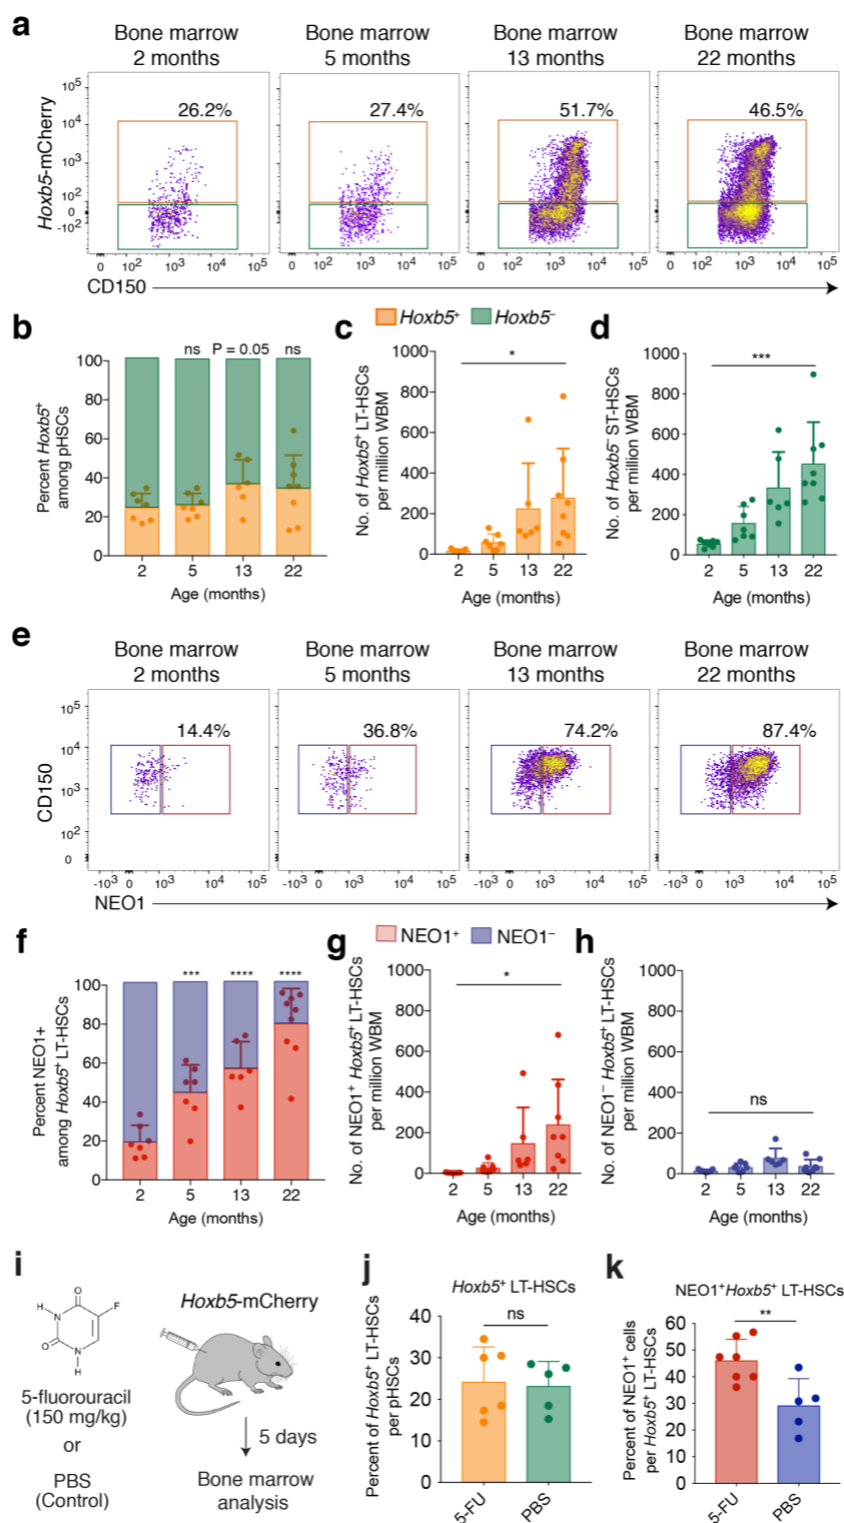

610 **Figure 2 | NEO1<sup>+</sup>*Hoxb5*<sup>+</sup> LT-HSCs selectively expand during aging and respond to**  
 611 **myeloablative stress. (a-d) Frequency and number of *Hoxb5*<sup>+</sup> LT-HSCs and *Hoxb5*<sup>-</sup> ST-HSCs**  
 612 **during aging. (a) Representative flow cytometry diagrams of *Hoxb5*-mCherry (y-axis) expression**  
 613 **in the mouse bone marrow at 2 (*n* = 7 mice), 5 (*n* = 7 mice), 13 (*n* = 6 mice), and 22 (*n* = 9 mice)**  
 614 **months of age. (b) Percent of cells among pHSCs that are *Hoxb5*<sup>+</sup> (orange) and *Hoxb5*<sup>-</sup>**



615 (green). Statistical significance was calculated using an unpaired, two-tailed Student's *t*-test  
616 between 2 months and each time point. ns = non-significant,  $P \geq 0.05$  (c) Number of *Hoxb5*<sup>+</sup> LT-  
617 HSCs per million whole bone marrow (WBM) cells. Statistical significance was calculated using  
618 an unpaired, two-tailed Student's *t*-test between 2 months and 22 months of age. \* $P < 0.05$ . (d)  
619 Number of *Hoxb5*<sup>-</sup> ST-HSCs per million whole bone marrow (WBM) cells. Statistical significance  
620 was calculated using an unpaired, two-tailed Student's *t*-test between 2 months and 22 months  
621 of age. \*\*\* $P < 0.001$ . (e-h) Frequency and number of NEO1<sup>+</sup> and NEO1<sup>-</sup>*Hoxb5*<sup>+</sup> LT-HSCs  
622 LTHSCs during aging. (e) Representative flow cytometry diagrams of NEO1 (x-axis) expression  
623 in the mouse bone marrow at 2 ( $n = 7$  mice), 5 ( $n = 7$  mice), 13 ( $n = 6$  mice), and 22 ( $n = 9$  mice)  
624 months of age. (f) Percent of cells among *Hoxb5*<sup>+</sup> LT-HSCs that are NEO1<sup>+</sup> (red) and NEO1<sup>-</sup>  
625 (blue). Statistical significance was calculated using an unpaired, two-tailed Student's *t*-test  
626 between 2 months and each time point. \*\*\* $P < 0.001$ , \*\*\*\* $P < 0.0001$  (g) Number of NEO1<sup>+</sup>  
627 *Hoxb5*<sup>+</sup> LT-HSCs per million whole bone marrow (WBM) cells. Statistical significance was  
628 calculated using an unpaired, two-tailed Student's *t*-test between 2 months and 22 months of  
629 age. \* $P < 0.05$ . (h) Number of NEO1<sup>-</sup> *Hoxb5*<sup>+</sup> LT-HSCs per million whole bone marrow (WBM)  
630 cells. Statistical significance was calculated using an unpaired, two-tailed Student's *t*-test  
631 between 2 months and 22 months of age. ns = non-significant,  $P \geq 0.05$ . (i-k) Response of HSC  
632 subpopulations from 4-month-old *Hoxb5*-mCherry mice 5 days after treatment with 5-fluoruracil  
633 (5-FU). (i) Experimental design of myeloablative stress with 5-FU ( $n = 6$  mice) with PBS control  
634 ( $n = 5$  mice). (j) Frequency of *Hoxb5*<sup>+</sup> LT-HSCs and *Hoxb5*<sup>-</sup> ST-HSCs among all pHSCs 5 days  
635 after treatment with 5-FU or PBS. Statistical significance was calculated using an unpaired, two-  
636 tailed Student's *t*-test. ns = non-significant,  $P \geq 0.05$ . (k) Frequency of NEO1<sup>+</sup> and NEO1<sup>-</sup>  
637 *Hoxb5*<sup>+</sup> LT-HSCs among all *Hoxb5*<sup>+</sup> LT-HSCs 5 days after treatment with 5-FU or PBS.  
638 Statistical significance was calculated using an unpaired, two-tailed Student's *t*-test. \*\* $P < 0.01$ .

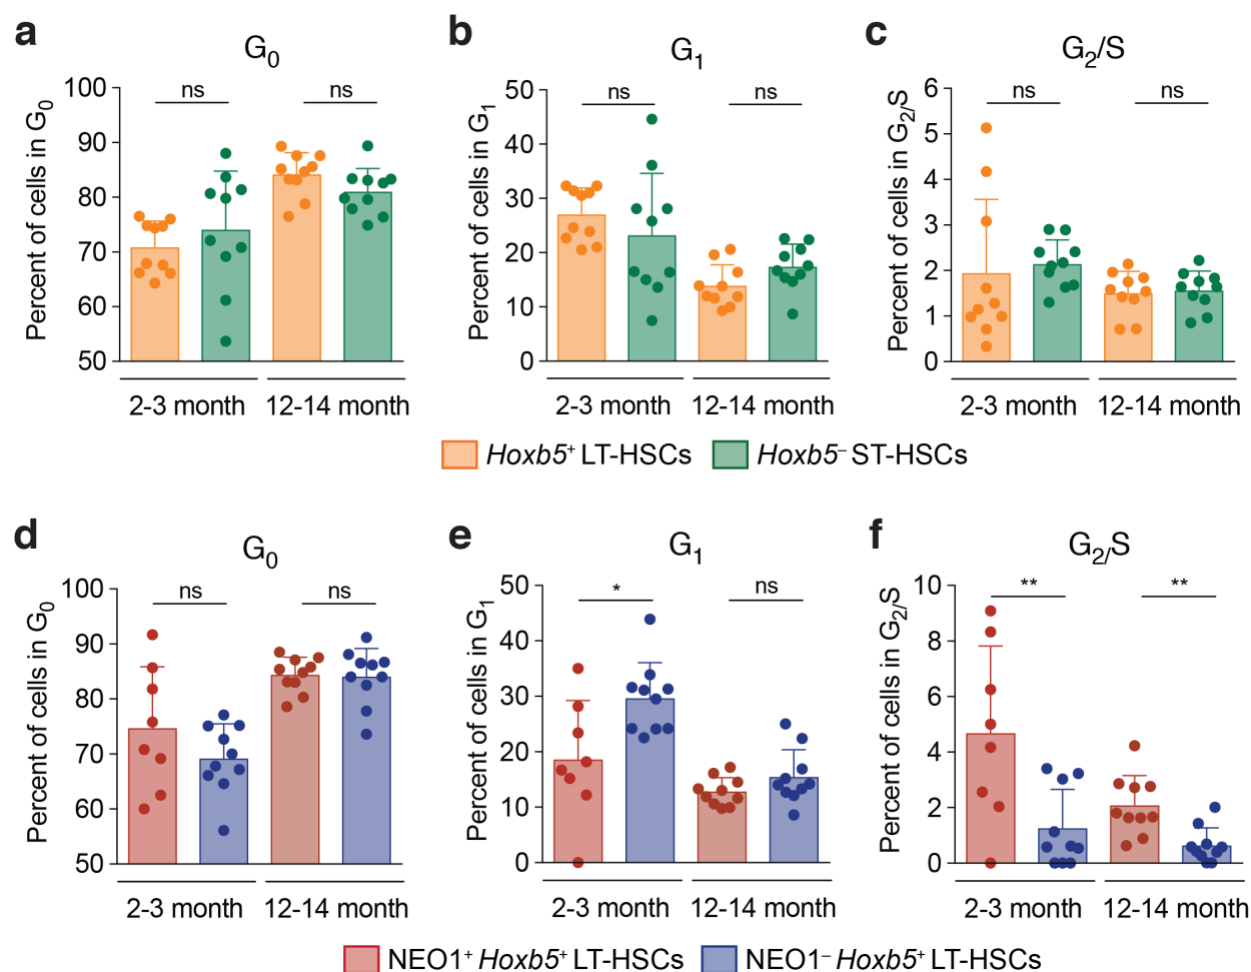

639 **Figure 3 | Neogenin-1 marks a more proliferative fraction of LT-HSCs.** (a-f) Cell cycle  
 640 analysis of 2-to-3-month-old ( $n = 10$  mice) and 12-to-14-month-old ( $n = 10$  mice) LT-HSC  
 641 fractions with Ki-67 and DAPI staining. (a-c) Percent of  $Hoxb5^+$  LT-HSCs or  $Hoxb5^-$  ST-HSCs in  
 642 (a)  $G_0$ , (b)  $G_1$ , and (c)  $G_2/S$  in 2-to-3-month-old and 12-to-14-month-old mouse bone marrow.  
 643 Statistical significance was calculated using an unpaired, two-tailed Student's  $t$ -test. ns = non-  
 644 significant,  $P \geq 0.05$ . (d-f) Percent of  $NEO1^+$  or  $NEO1^-$   $Hoxb5^+$  LT-HSCs in (d)  $G_0$ , (e)  $G_1$ , and  
 645 (f)  $G_2/S$  in 2-to-3-month-old and 12-to-14-month-old mouse bone marrow. Statistical significance  
 646 was calculated using an unpaired, two-tailed Student's  $t$ -test. ns = non-significant,  $P \geq 0.05$ , \* $P$   
 647  $< 0.05$ , \*\* $P < 0.01$ .

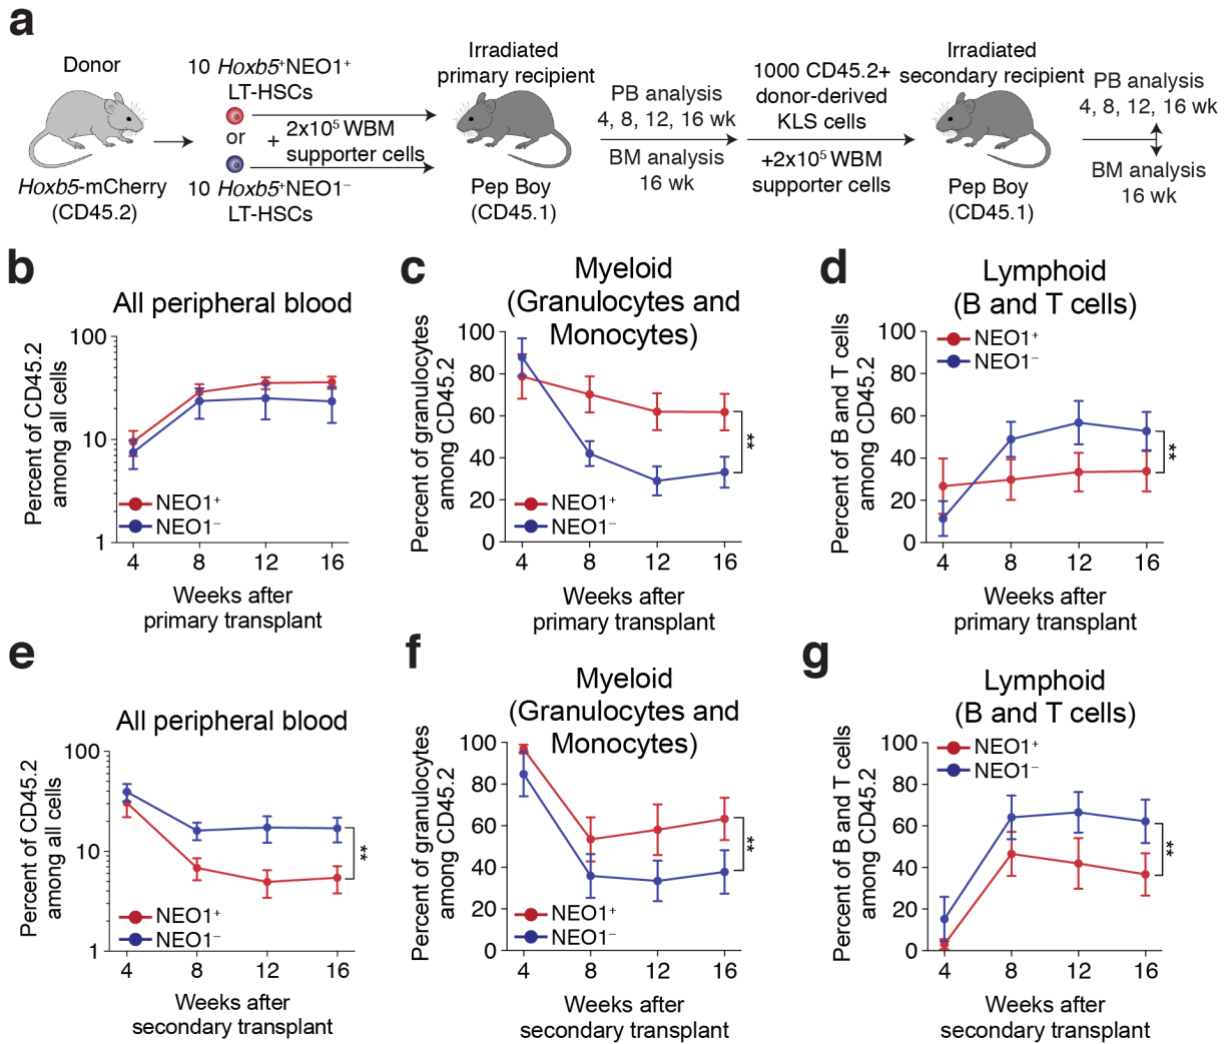

648 **Figure 4 | NEO1<sup>+</sup> *Hoxb5*<sup>+</sup>LT-HSCs exhibit myeloid bias and reduced reconstitution**  
 649 **potential upon serial transplantation.** (a) Experimental design for primary and secondary  
 650 transplantations of NEO1<sup>+</sup> and NEO1<sup>-</sup>*Hoxb5*<sup>+</sup> LT-HSCs. (b-d) Measurements of reconstitution  
 651 potential and lineage priming after primary transplantation ('NEO1<sup>+</sup>', *n* = 12 mice; 'NEO1<sup>-</sup>', *n* =  
 652 11 mice). (b) Percent of donor-derived (CD45.2<sup>+</sup>) cells among all peripheral blood cells at 4, 8,  
 653 12, and 16 weeks post-transplant. (c) Percent of myeloid cells (GR1<sup>+</sup>CD11B<sup>+</sup> granulocytes and  
 654 monocytes) among donor-derived (CD45.2<sup>+</sup>) cells at 4, 8, 12, and 16 weeks post-transplant. (d)  
 655 Percent of lymphoid cells (B220<sup>+</sup> B cells and CD3<sup>+</sup> T cells) among donor-derived (CD45.2<sup>+</sup>)  
 656 cells at 4, 8, 12, and 16 weeks post-transplant. (e-g) Same as in b-d but analyzing peripheral blood  
 657 in secondary recipients transplanted with 1000 donor-derived Lin<sup>-</sup>c-KIT<sup>+</sup>SCA1<sup>+</sup> (KLS) cells from  
 658 primary hosts ('NEO1<sup>+</sup>', *n* = 8; 'NEO1<sup>-</sup>', *n* = 9). Statistical significance for b-g was calculated  
 659 using two-way ANOVA with time post-transplant and NEO1 status as factors. \*\**P* < 0.01.

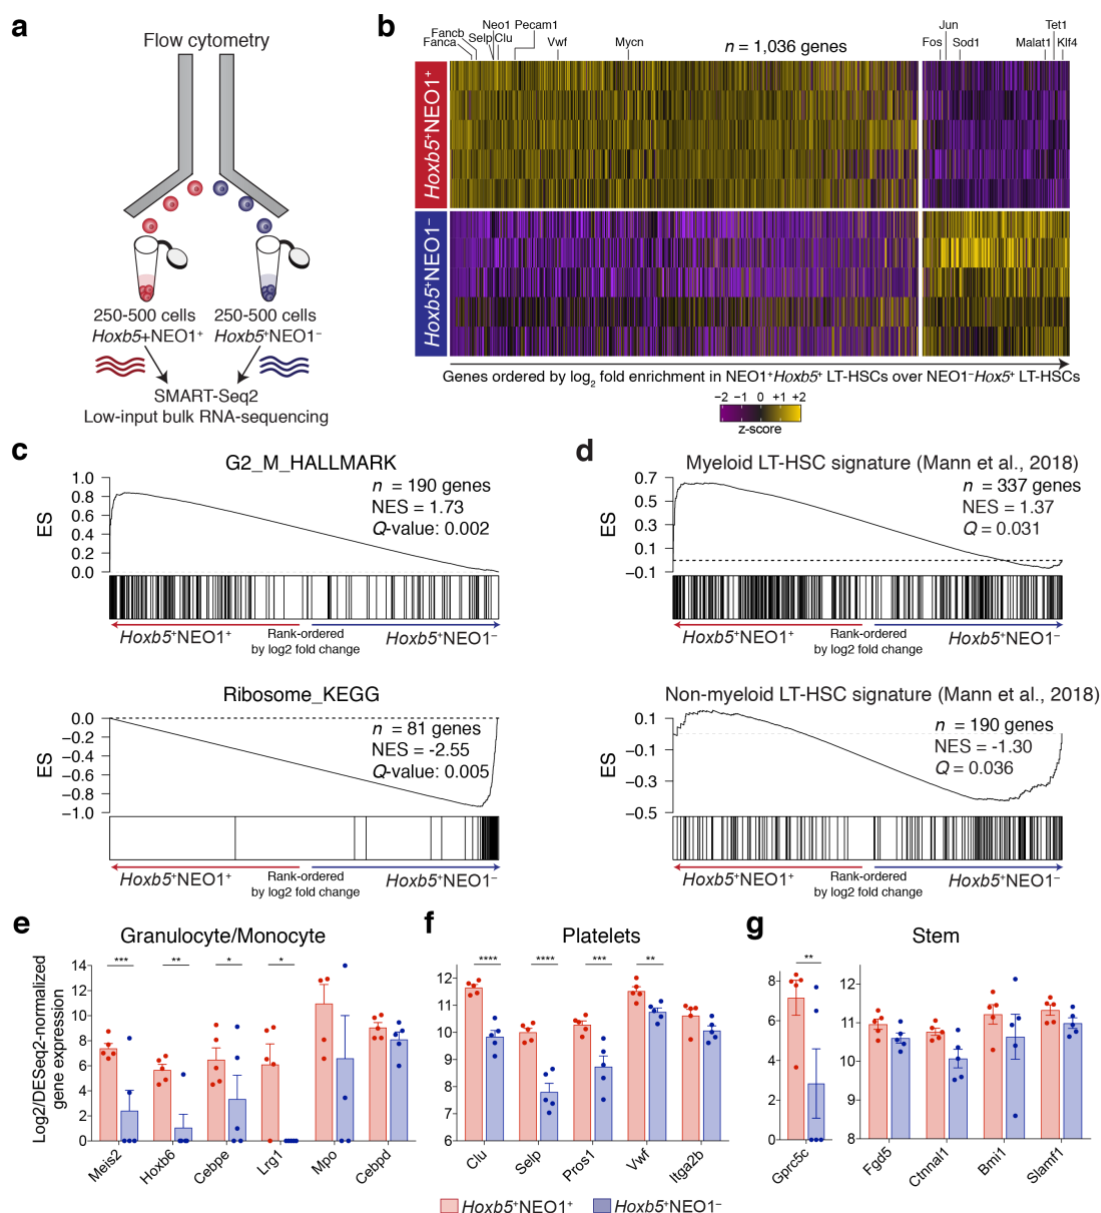

660 **Figure 5 | Distinct transcriptional signatures of NEO1<sup>+</sup> and NEO1<sup>-</sup> *Hoxb5*<sup>+</sup>LT-HSCs.** (a)  
 661 Experimental design for bulk RNA-sequencing of NEO1<sup>+</sup> and NEO1<sup>-</sup> *Hoxb5*<sup>+</sup> LT-HSCs. (b)  
 662 Heatmap of differentially expressed genes ( $n = 1,036$  genes; FDR < 0.1) after pairwise  
 663 comparison of NEO1<sup>+</sup> ( $n = 5$  samples) and NEO1<sup>-</sup> ( $n = 5$  samples) *Hoxb5*<sup>+</sup> LT-HSC  
 664 transcriptomes using DESeq2. Select genes are highlighted. Genes are ordered from left to  
 665 right by log<sub>2</sub> fold enrichment in NEO1<sup>+</sup> over NEO1<sup>-</sup> *Hoxb5*<sup>+</sup> LT-HSCs. (c,d) Gene set enrichment  
 666 analysis (GSEA) plots of molecular signatures significantly enriched (Q value < 0.05) over a  
 667 gene list ordered by log<sub>2</sub> fold change, including (c) 'G2\_M\_HALLMARK' (top),  
 668 'RIBOSOME\_KEGG' (bottom), (d) Myeloid LT-HSC signature (top), and non-myeloid LT-HSC  
 669 signature (bottom) from Mann et al., 2018<sup>18</sup>. NES, normalized enrichment score. (e-g) Barplots  
 670 showing log<sub>2</sub> and DESeq2-normalized gene expression for select genes associated with (e)  
 671 granulocyte or monocyte, (f) platelet, or (g) stem programs. Statistical significance was  
 672 calculated using a paired, two-tailed Student's *t*-test adjusted for multiple hypothesis testing with  
 673 Benjamini-Hochberg procedure. \**P*-adjusted < 0.05, \*\**P*-adjusted < 0.01, \*\*\**P*-adjusted < 0.001,  
 674 \*\*\*\**P*-adjusted < 0.0001.

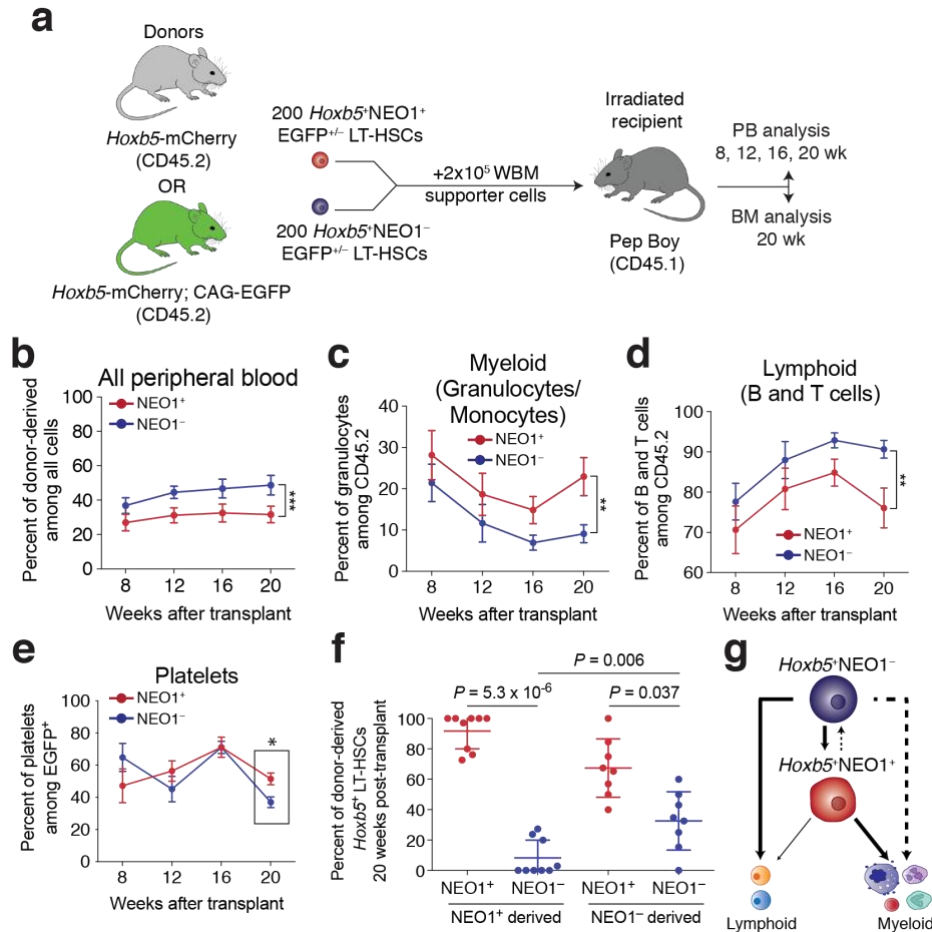

675 **Figure 6 | NEO1<sup>-</sup>*Hoxb5*<sup>+</sup> LT-HSCs outcompete NEO1<sup>+</sup>*Hoxb5*<sup>+</sup> LT-HSCs in reconstitution**  
 676 **potential and reside at the apex of the hematopoietic hierarchy.** (a) Experimental design for  
 677 competitive transplantation of NEO1<sup>+</sup> and NEO1<sup>-</sup>*Hoxb5*<sup>+</sup> LT-HSCs (*n* = 12 mice). (b-d)  
 678 Measurements of reconstitution potential and lineage priming after competitive transplantation.  
 679 (b) Percent of donor-derived cells among all peripheral blood cells at 8, 12, 16, and 20 weeks  
 680 post-transplant. (c) Percent of myeloid cells (GR1<sup>+</sup>CD11b<sup>+</sup> granulocytes and monocytes) among  
 681 donor-derived cells at 8, 12, 16, and 20 weeks post-transplant. (d) Percent of lymphoid cells  
 682 (B220<sup>+</sup> B cells and CD3<sup>+</sup> T cells) among donor-derived cells at 8, 12, 16, and 20 weeks post-  
 683 transplant. Statistical significance for b-d was calculated using two-way ANOVA with time post-  
 684 transplant and NEO1 status as factors. \*\**P* < 0.01, \*\*\**P* < 0.01. (e) Percent of platelets  
 685 (EGFP<sup>+</sup>CD41<sup>+</sup>) among donor-derived cells at 8, 12, 16, and 20 weeks post-transplant. Statistical  
 686 significance at 20 weeks post-transplant was calculated using an unpaired, two-tailed Student's  
 687 *t*-test. \**P* < 0.05. (f) Percent of NEO1<sup>+</sup> and NEO1<sup>-</sup> *Hoxb5*<sup>+</sup> LT-HSCs derived from donor NEO1<sup>+</sup>  
 688 and NEO1<sup>-</sup>*Hoxb5*<sup>+</sup> LT-HSCs in the mouse bone marrow 20 weeks post-transplant. Only  
 689 samples for which *Hoxb5*<sup>+</sup> LT-HSCs were present are shown ('NEO1<sup>+</sup> derived', *n* = 9; 'NEO1<sup>-</sup>  
 690 derived', *n* = 8). Statistical significance was calculated using a paired, two-tailed Student's *t*-test  
 691 between the percent of NEO1<sup>+</sup> and NEO1<sup>-</sup>*Hoxb5*<sup>+</sup> LT-HSCs derived from the same donor and  
 692 an unpaired, two-tailed Student's *t*-test between the percent of NEO1<sup>-</sup>*Hoxb5*<sup>+</sup> LT-HSCs  
 693 between NEO1<sup>+</sup> and NEO1<sup>-</sup> donors. *P* values are indicated on the graph. (g) Schema  
 694 depicting a revised model of long-term hematopoiesis with a lineage-balanced, quiescent  
 695 NEO1<sup>-</sup>*Hoxb5*<sup>+</sup> LT-HSC residing above a downstream myeloid-biased NEO1<sup>+</sup>*Hoxb5*<sup>+</sup> LT-HSC.  
 696 The thickness of the lines indicates the degree of contribution and dashed lines mark putative  
 697 differentiation paths.



a.

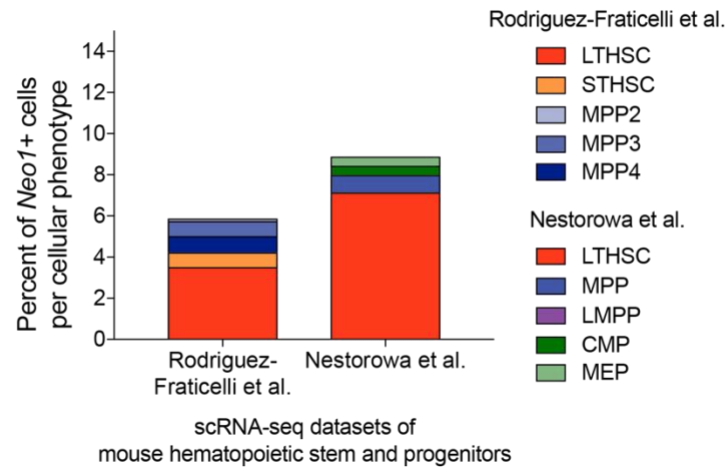

b.

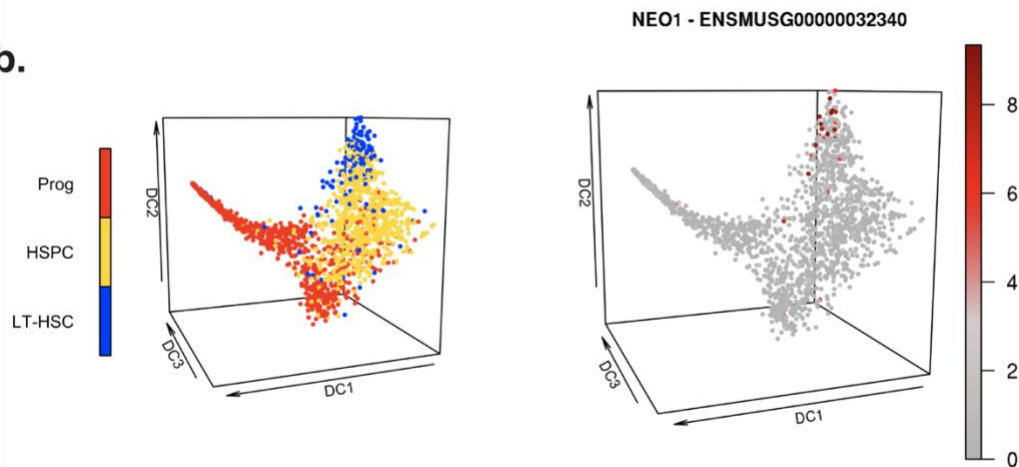

698 **Supplementary Figure 1 | Single cell RNA sequencing shows selective expression of**  
699 **Neogenin-1 in a subset of LT-HSCs.** (a-b) *Neo1* expression in published single cell RNA  
700 sequencing (scRNA-seq) data of mouse hematopoietic stem and progenitor cells (HSPCs). (a)  
701 Percent of NEO1<sup>+</sup> cells among each phenotype defined by the authors of two independent  
702 scRNA-seq studies<sup>21,56</sup>. (b) 3-D diffusion map of 1,656 single HSPCs displaying known  
703 phenotype (*left*) and *Neo1* expression (*right*)<sup>56</sup>. Image was adapted from the 'Single-Cell Gene  
704 Expression Atlas' (<http://blood.stemcells.cam.ac.uk>).

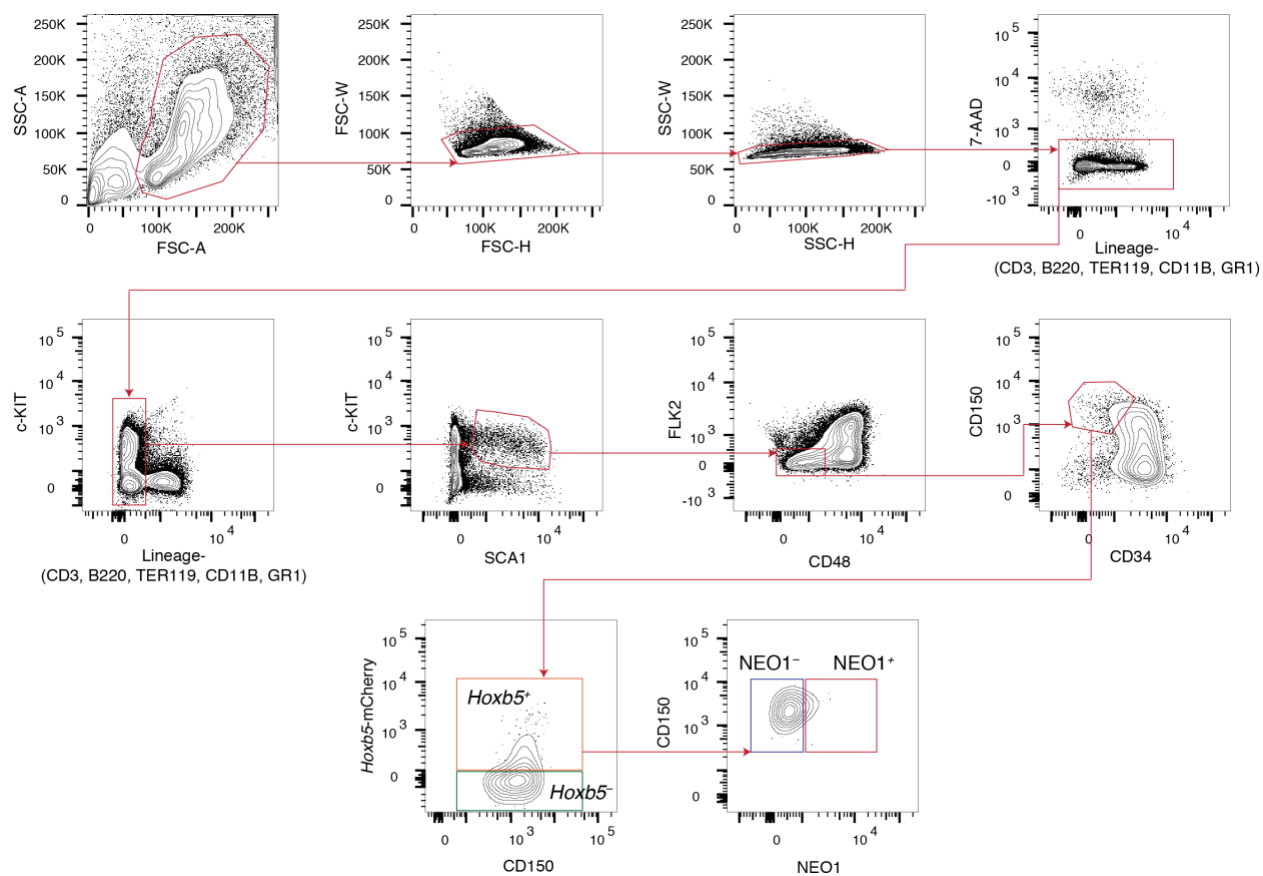

705 **Supplementary Figure 2 | Gating scheme for the prospective isolation of NEO1<sup>+</sup> and**  
706 **NEO1<sup>-</sup> *Hoxb5*<sup>+</sup> LT-HSCs by flow cytometry.** Arrows indicate the gating sequence. All gates  
707 were drawn with respect to fluorescence-minus-one (FMO) controls. SSC, side scatter; FSC,  
708 forward scatter; 7-AAD, 7-Aminoactinomycin D.

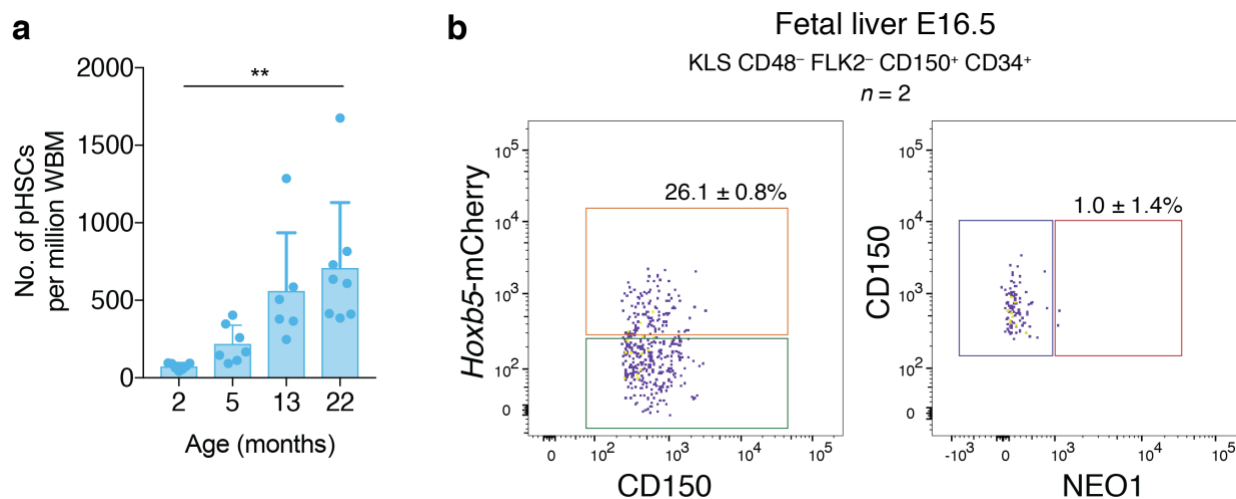

709  
710 **Supplementary Figure 3 | pHSC expansion in the bone marrow with age and NEO1**  
711 **expression in the mouse fetal liver. (a)** Barplots showing the number of pHSCs per million  
712 whole bone marrow (WBM) cells. Statistical significance was calculated using an unpaired, two-  
713 tailed Student's *t*-test between 2 months and 22 months of age. \*\**P* < 0.01. **(b)** Representative  
714 flow diagram of *Hoxb5*-mCherry and NEO1 expression in the E16.5 mouse fetal liver (*n* = 2).

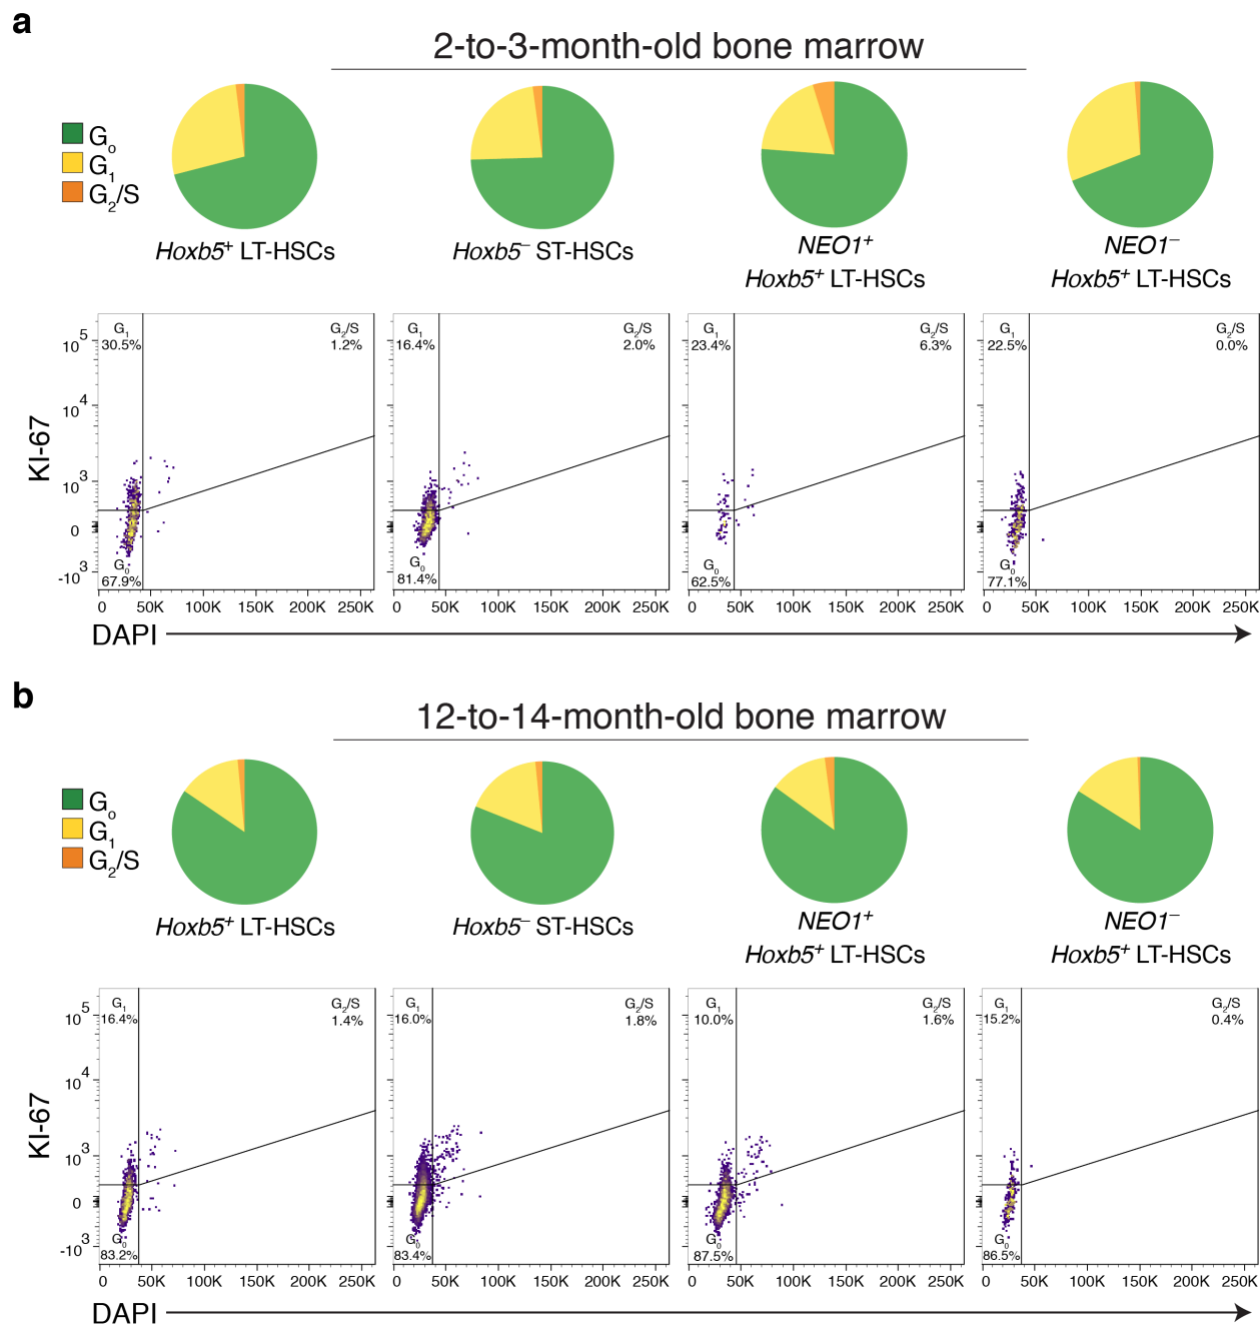

715 **Supplementary Figure 4 | Cell cycle analysis of *Hoxb5*<sup>-</sup> ST-HSCs, *Hoxb5*<sup>+</sup> LT-HSCs, and**  
 716 ***NEO1*<sup>+</sup> and *NEO1*<sup>-</sup> *Hoxb5*<sup>+</sup> LT-HSCs.** (a) Pie charts (top) showing the average percent of each  
 717 cell type from 2-to-3-month-old mouse bone marrow in  $G_0$  (green),  $G_1$  (yellow), and  $G_2/S$   
 718 (orange) as measured by flow cytometry analysis of KI-67 and DAPI staining (bottom). Same as  
 719 in (b) but with 12-to-14-month-old mouse bone marrow. KI-67 gates were drawn with respect  
 720 to a fluorescence-minus-one (FMO) control.

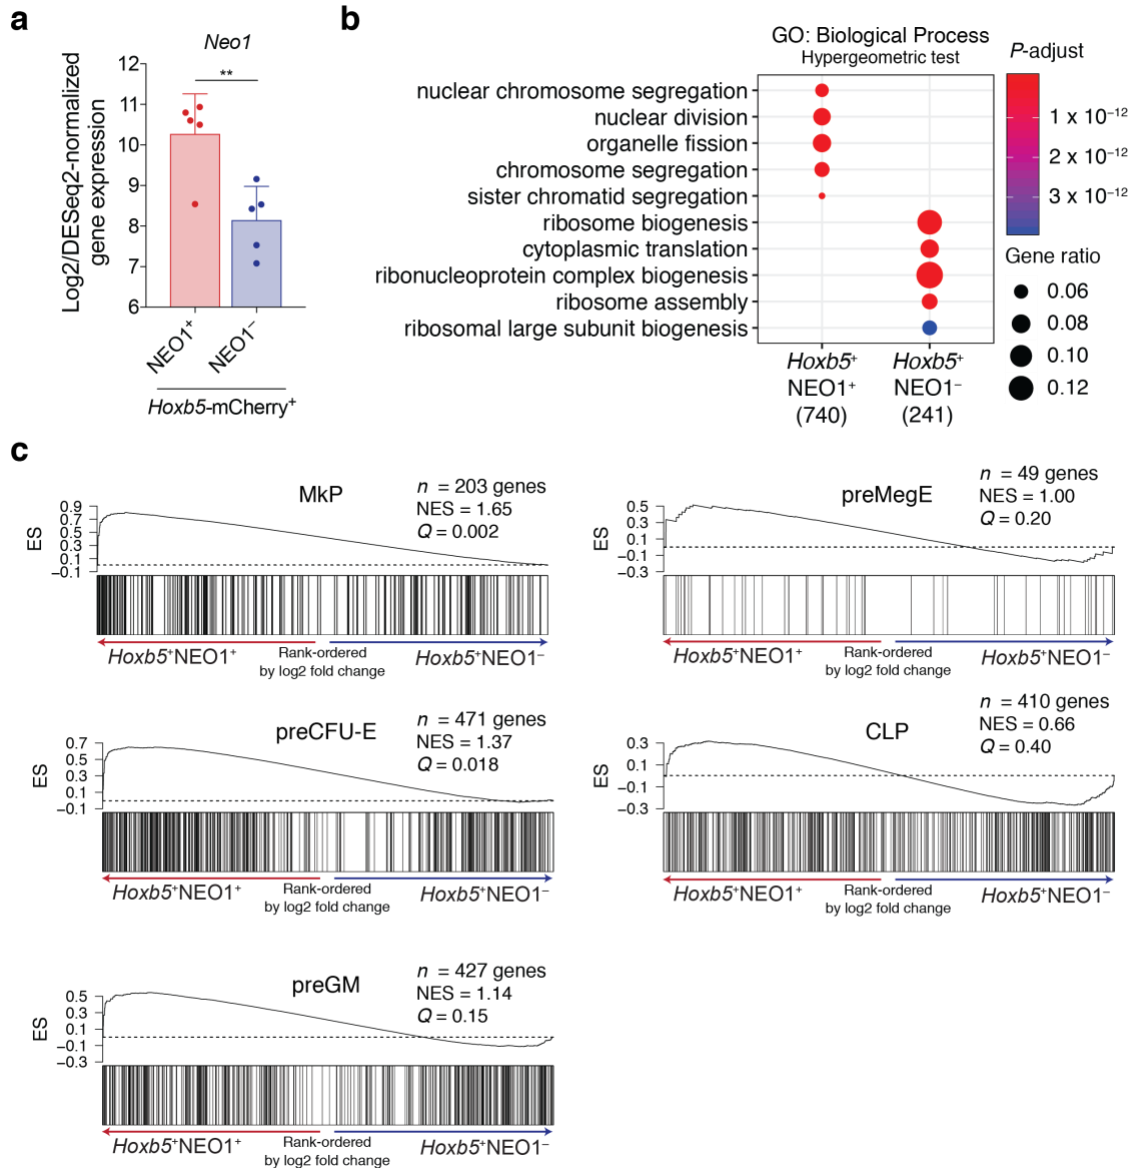

721 **Supplementary Figure 5 | Enrichment of GO biological processes and lineage-restricted**  
 722 **progenitor signatures in  $NEO1^+$  and  $NEO1^-$   $Hoxb5^+$  LT-HSC transcriptomes.** (a) Barplots  
 723 showing  $\log_2$  and DESeq2-normalized gene expression of *Neo1* in  $NEO1^+$  and  $NEO1^-$  cells  
 724 isolated by flow cytometry. Statistical significance was calculated using a paired, two-tailed  
 725 Student's *t*-test adjusted for multiple hypothesis testing with Benjamini-Hochberg procedure. \*\*  $P$   
 726  $< 0.01$ . (b) Dot plots showing the top 5 'GO: Biological Process' pathways enriched in  $NEO1^+$   
 727 and  $NEO1^-$   $Hoxb5^+$  LT-HSCs by hypergeometric test. *P*-adjusted values are indicated by color  
 728 gradient and gene ratios by dot size. Number of genes significantly enriched in  $NEO1^+$  or  
 729  $NEO1^-$  are indicated in parenthesis below each column. (c) GSEA plots showing enrichment of  
 730 gene set signatures of lineage restricted progenitors from a previous study<sup>26</sup> over a gene list  
 731 ordered by  $\log_2$  fold change in  $NEO1^+$  versus  $NEO1^-$   $Hoxb5^+$  LT-HSCs. NES, normalized  
 732 enrichment score and Q values are indicated on the graph. MkP, megakaryocyte progenitor;  
 733 preCFU-E, pre-erythrocyte colony-forming units; preGM, pre-granulocyte/macrophage  
 734 progenitors; preMegE, pre-megakaryocyte/erythrocyte progenitors; CLP, common lymphoid  
 735 progenitor.



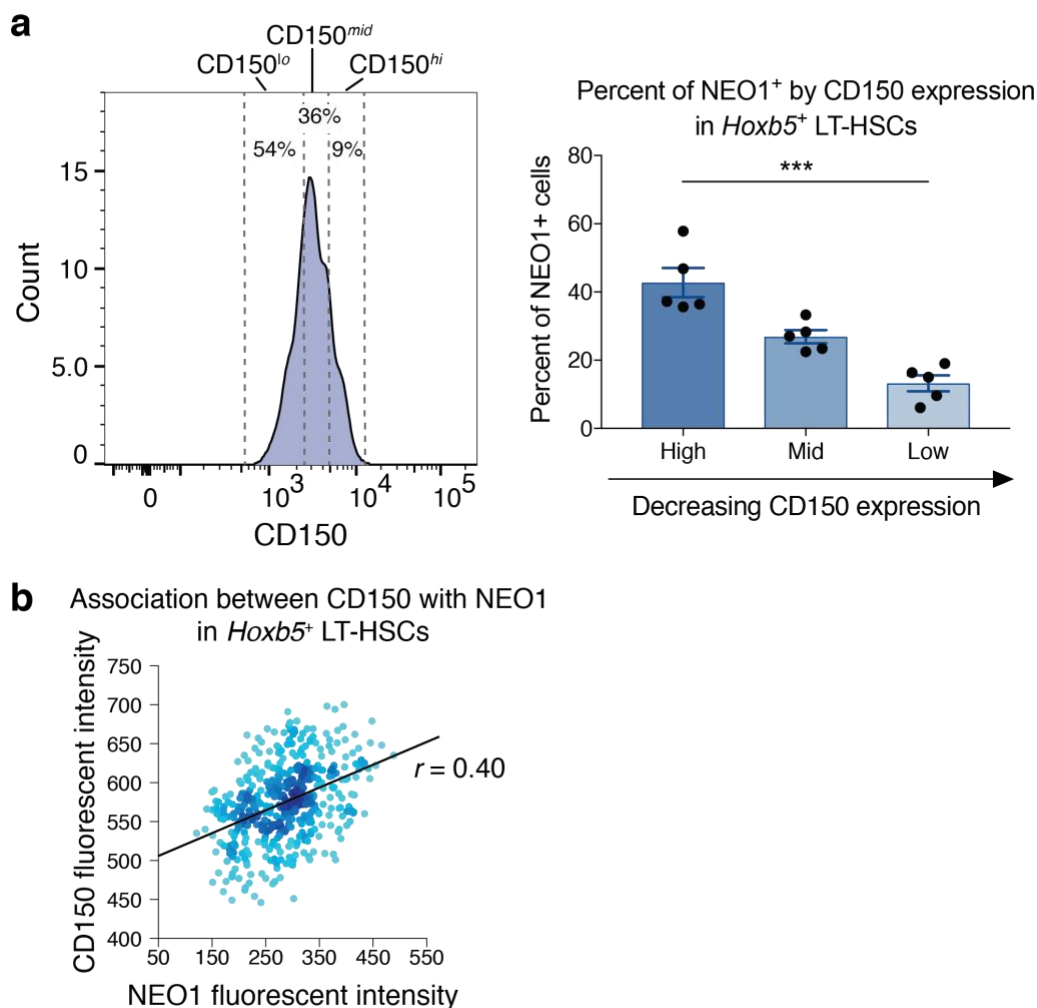

736 **Supplementary Figure 6 | Association between NEO1 and CD150 in *Hoxb5*<sup>+</sup> LT-HSCs by**  
737 **flow cytometry.** (a) Histogram (*left*) and bar plots (*right*) showing the percent of NEO1<sup>+</sup> cells in  
738 three bins of CD150 expression, including 'High', 'Mid', and 'Low'. Statistical significance was  
739 calculated by a paired, two-tailed Student's *t*-test between 'High' and 'Low'. \*\*\**P* < 0.001. (b)  
740 Representative flow cytometry diagram of NEO1 fluorescent intensity (*x*-axis) and CD150  
741 fluorescent intensity (*y*-axis) with a linear regression line and Pearson correlation coefficient  
742 shown.

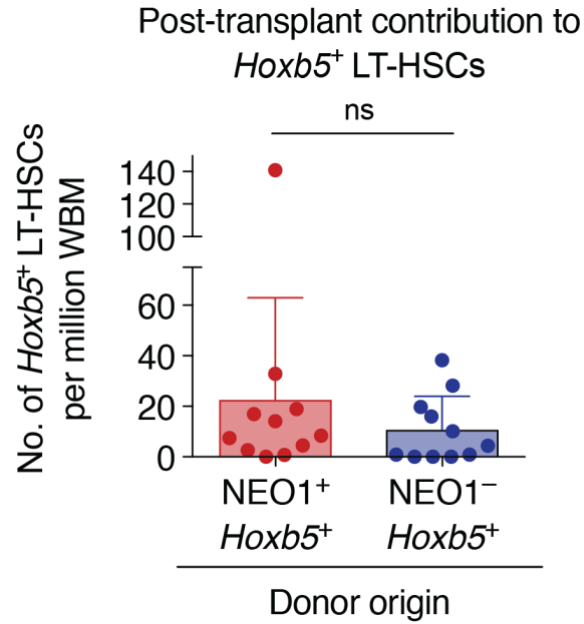

743 **Supplementary Figure 7 | Post-transplant contribution of NEO1<sup>+</sup> and NEO1<sup>-</sup> *Hoxb5*<sup>+</sup> LT-**  
744 **HSCs to *Hoxb5*<sup>+</sup> LT-HSCs.** Bar plot showing the number of *Hoxb5*<sup>+</sup> LT-HSCs per million whole  
745 bone marrow (WBM) cells from each donor population 20 weeks after competitive transplant of  
746 NEO1<sup>+</sup> and NEO1<sup>-</sup> *Hoxb5*<sup>+</sup> LT-HSCs. Statistical significance was calculated by a paired, two-  
747 tailed Student's *t*-test. ns = not significant,  $P \geq 0.05$ .

748 **Statistics**

749 Statistical significance between two groups was determined using a paired or unpaired  
750 Student's *t* test, as appropriate. For comparison of two groups across multiple time points,  
751 statistical significance was determined using a two-way ANOVA using the groups and time  
752 points as factors. Multiple hypothesis correction was applied to gene expression comparisons  
753 using the Benjamini-Horchberg procedure. Results with *P* or *P-adjusted* < 0.05 were  
754 considered significant. Data analyses were performed with R 3.5.1, Prism v7 (GraphPad  
755 Software, Inc.), and FlowJo v10 (FlowJo, LLC). The investigators were not blinded to  
756 allocation during experiments and outcome assessment. No sample-size estimates were  
757 performed to ensure adequate power to detect a pre-specified effect size.

758  
759 **Acknowledgements**

760 We thank R. Yamamoto, C.K.F. Chan, J. Xiang, V. Mascetti, V.G. Alvarado, A. Chandra, and A.  
761 Manjunath for technical assistance and discussion. We are grateful to T. Naik for lab  
762 management, A. McCarty and C. Wang for mouse breeding and management, P. Lovelace and  
763 S. Weber for their support and assistance with FACS, and Stanford Functional Genomic Facility  
764 (SFGF) for assistance with sequencing scRNA-seq libraries. We thank K. Kao, T. Sakamaki,  
765 and M. Miyanishi for assistance with breeding the *Hoxb5*-mCherry and *CAG-EGFP;Hoxb5*-  
766 mCherry mouse strains. We also thank Alicja Jozkowicz for providing funds to support M.Z. for  
767 her externship in I.L.W.'s laboratory.

768  
769 **Funding**

770 This study was supported by the California Institute for Regenerative Medicine (RT3-07683) to  
771 I.L.W.; Stanford-UC Berkeley Stem Cell Institute, anonymous donors; National Cancer Institute,  
772 DHHS (PHS Grant Number CA09302), NHLBI Ruth L. Kirschstein National Research Service  
773 Award (F30HL147460), and the Stanford Medical Science Training Program to G.S.G.  
774 Foundation For Polish Science (HOMING POIR.04.04.00-00-5F16/18-00) and MOBILITY PLUS  
775 Fellowship from the Polish Ministry of Science and Higher Education to K.S. HARMONIA UMO-  
776 2015/18/M/NZ3/00387 to Alicja Jozkowicz and Leading National Research Center (KNOW) to  
777 the Faculty of Biochemistry, Biophysics, and Biotechnology of Jagiellonian University,  
778 supporting M.Z. Stanford Vice President for Undergraduate Research office (VPUE) grant and  
779 Bio-X summer funding to J.N.

780  
781 **Author contributions**

782 K.S. identified Neogenin-1. K.S., G.S.G., M.Z., and I.L.W. designed the experiments; K.S.,  
783 G.S.G., M.Z., J.N., A.Z., R.S., B.G., and D.W. performed the experiments. K.S., G.S.G., M.Z.,  
784 and J.N. analyzed the data. G.S.G., K.S., M.Z., and I.L.W. wrote the manuscript. I.L.W.  
785 supervised the study. All authors commented on the manuscript at all stages.

786  
787 **Competing interests:**

788 Authors declare no competing interests.

789  
790 **Data and materials availability**

791 All expression datasets from the public domain analyzed in this work are described in **Materials**  
792 **and Methods**. GEO accession code for the bulk RNA-seq expression data generated in this  
793 study is pending.

794 **References:**

- 795
- 796 1 Seita, J. & Weissman, I. L. Hematopoietic stem cell: self-renewal versus differentiation.  
797 *Wiley Interdiscip Rev Syst Biol Med* **2**, 640-653, doi:10.1002/wsbm.86 (2010).
- 798 2 Spangrude, G. J., Heimfeld, S. & Weissman, I. L. Purification and characterization of  
799 mouse hematopoietic stem cells. *Science* **241**, 58-62 (1988).
- 800 3 Ikuta, K. & Weissman, I. L. Evidence that hematopoietic stem cells express mouse c-kit  
801 but do not depend on steel factor for their generation. *Proc Natl Acad Sci U S A* **89**, 1502-  
802 1506 (1992).
- 803 4 Osawa, M., Hanada, K., Hamada, H. & Nakauchi, H. Long-term lymphohematopoietic  
804 reconstitution by a single CD34-low/negative hematopoietic stem cell. *Science* **273**, 242-  
805 245 (1996).
- 806 5 Kiel, M. J. *et al.* SLAM family receptors distinguish hematopoietic stem and progenitor  
807 cells and reveal endothelial niches for stem cells. *Cell* **121**, 1109-1121,  
808 doi:10.1016/j.cell.2005.05.026 (2005).
- 809 6 Christensen, J. L. & Weissman, I. L. Flk-2 is a marker in hematopoietic stem cell  
810 differentiation: a simple method to isolate long-term stem cells. *Proc Natl Acad Sci U S A*  
811 **98**, 14541-14546, doi:10.1073/pnas.261562798 (2001).
- 812 7 Gazit, R. *et al.* Fgd5 identifies hematopoietic stem cells in the murine bone marrow. *J*  
813 *Exp Med* **211**, 1315-1331, doi:10.1084/jem.20130428 (2014).
- 814 8 Chen, J. Y. *et al.* Hoxb5 marks long-term haematopoietic stem cells and reveals a  
815 homogenous perivascular niche. *Nature* **530**, 223-227, doi:10.1038/nature16943 (2016).
- 816 9 Acar, M. *et al.* Deep imaging of bone marrow shows non-dividing stem cells are mainly  
817 perisinusoidal. *Nature* **526**, 126-130, doi:10.1038/nature15250 (2015).
- 818 10 de Haan, G. & Lazare, S. S. Aging of hematopoietic stem cells. *Blood* **131**, 479-487,  
819 doi:10.1182/blood-2017-06-746412 (2018).
- 820 11 Morrison, S. J., Wandycz, A. M., Akashi, K., Globerson, A. & Weissman, I. L. The aging  
821 of hematopoietic stem cells. *Nat Med* **2**, 1011-1016 (1996).
- 822 12 Wright, D. E., Bowman, E. P., Wagers, A. J., Butcher, E. C. & Weissman, I. L.  
823 Hematopoietic stem cells are uniquely selective in their migratory response to  
824 chemokines. *J Exp Med* **195**, 1145-1154 (2002).
- 825 13 Passegue, E., Wagers, A. J., Giuriato, S., Anderson, W. C. & Weissman, I. L. Global  
826 analysis of proliferation and cell cycle gene expression in the regulation of hematopoietic  
827 stem and progenitor cell fates. *J Exp Med* **202**, 1599-1611, doi:10.1084/jem.20050967  
828 (2005).
- 829 14 Fleming, W. H. *et al.* Functional heterogeneity is associated with the cell cycle status of  
830 murine hematopoietic stem cells. *J Cell Biol* **122**, 897-902 (1993).
- 831 15 Beerman, I. *et al.* Functionally distinct hematopoietic stem cells modulate hematopoietic  
832 lineage potential during aging by a mechanism of clonal expansion. *Proc Natl Acad Sci U*  
833 *S A* **107**, 5465-5470, doi:10.1073/pnas.1000834107 (2010).
- 834 16 Rossi, D. J. *et al.* Deficiencies in DNA damage repair limit the function of  
835 haematopoietic stem cells with age. *Nature* **447**, 725-729, doi:10.1038/nature05862  
836 (2007).
- 837 17 Rossi, D. J. *et al.* Cell intrinsic alterations underlie hematopoietic stem cell aging. *Proc*  
838 *Natl Acad Sci U S A* **102**, 9194-9199, doi:10.1073/pnas.0503280102 (2005).

- 839 18 Mann, M. *et al.* Heterogeneous Responses of Hematopoietic Stem Cells to Inflammatory  
840 Stimuli Are Altered with Age. *Cell Rep* **25**, 2992-3005 e2995,  
841 doi:10.1016/j.celrep.2018.11.056 (2018).
- 842 19 MacLean, A. L. *et al.* Single Cell Phenotyping Reveals Heterogeneity Among  
843 Hematopoietic Stem Cells Following Infection. *Stem Cells* **35**, 2292-2304,  
844 doi:10.1002/stem.2692 (2017).
- 845 20 Lu, R., Czechowicz, A., Seita, J., Jiang, D. & Weissman, I. L. Clonal-level lineage  
846 commitment pathways of hematopoietic stem cells in vivo. *Proc Natl Acad Sci U S A*  
847 **116**, 1447-1456, doi:10.1073/pnas.1801480116 (2019).
- 848 21 Rodriguez-Fraticelli, A. E. *et al.* Clonal analysis of lineage fate in native haematopoiesis.  
849 *Nature* **553**, 212-216, doi:10.1038/nature25168 (2018).
- 850 22 Dykstra, B. *et al.* Long-term propagation of distinct hematopoietic differentiation  
851 programs in vivo. *Cell Stem Cell* **1**, 218-229, doi:10.1016/j.stem.2007.05.015 (2007).
- 852 23 Yamamoto, R. *et al.* Large-Scale Clonal Analysis Resolves Aging of the Mouse  
853 Hematopoietic Stem Cell Compartment. *Cell Stem Cell* **22**, 600-607 e604,  
854 doi:10.1016/j.stem.2018.03.013 (2018).
- 855 24 Yamamoto, R. *et al.* Clonal analysis unveils self-renewing lineage-restricted progenitors  
856 generated directly from hematopoietic stem cells. *Cell* **154**, 1112-1126,  
857 doi:10.1016/j.cell.2013.08.007 (2013).
- 858 25 Gekas, C. & Graf, T. CD41 expression marks myeloid-biased adult hematopoietic stem  
859 cells and increases with age. *Blood* **121**, 4463-4472, doi:10.1182/blood-2012-09-457929  
860 (2013).
- 861 26 Sanjuan-Pla, A. *et al.* Platelet-biased stem cells reside at the apex of the haematopoietic  
862 stem-cell hierarchy. *Nature* **502**, 232-236, doi:10.1038/nature12495 (2013).
- 863 27 Wilson, N. H. & Key, B. Neogenin: one receptor, many functions. *Int J Biochem Cell*  
864 *Biol* **39**, 874-878, doi:10.1016/j.biocel.2006.10.023 (2007).
- 865 28 Wilson, N. H. & Key, B. Neogenin interacts with RGMa and netrin-1 to guide axons  
866 within the embryonic vertebrate forebrain. *Dev Biol* **296**, 485-498,  
867 doi:10.1016/j.ydbio.2006.06.018 (2006).
- 868 29 Xu, K. *et al.* Neural migration. Structures of netrin-1 bound to two receptors provide  
869 insight into its axon guidance mechanism. *Science* **344**, 1275-1279,  
870 doi:10.1126/science.1255149 (2014).
- 871 30 Matsunaga, E. *et al.* RGM and its receptor neogenin regulate neuronal survival. *Nat Cell*  
872 *Biol* **6**, 749-755, doi:10.1038/ncb1157 (2004).
- 873 31 Bae, G. U. *et al.* Neogenin regulates skeletal myofiber size and focal adhesion kinase and  
874 extracellular signal-regulated kinase activities in vivo and in vitro. *Mol Biol Cell* **20**,  
875 4920-4931, doi:10.1091/mbc.E09-06-0491 (2009).
- 876 32 Zhang, A. S., West, A. P., Jr., Wyman, A. E., Bjorkman, P. J. & Enns, C. A. Interaction  
877 of hemojuvelin with neogenin results in iron accumulation in human embryonic kidney  
878 293 cells. *J Biol Chem* **280**, 33885-33894, doi:10.1074/jbc.M506207200 (2005).
- 879 33 Srinivasan, K., Strickland, P., Valdes, A., Shin, G. C. & Hinck, L. Netrin-1/neogenin  
880 interaction stabilizes multipotent progenitor cap cells during mammary gland  
881 morphogenesis. *Dev Cell* **4**, 371-382 (2003).
- 882 34 Park, K. W. *et al.* The axonal attractant Netrin-1 is an angiogenic factor. *Proc Natl Acad*  
883 *Sci U S A* **101**, 16210-16215, doi:10.1073/pnas.0405984101 (2004).



- 884 35 Seita, J. *et al.* Gene Expression Commons: an open platform for absolute gene expression  
885 profiling. *PLoS One* **7**, e40321, doi:10.1371/journal.pone.0040321 (2012).
- 886 36 Smith-Berdan, S. *et al.* Robo4 cooperates with CXCR4 to specify hematopoietic stem  
887 cell localization to bone marrow niches. *Cell Stem Cell* **8**, 72-83,  
888 doi:10.1016/j.stem.2010.11.030 (2011).
- 889 37 Yano, M. *et al.* Expression and function of murine receptor tyrosine kinases, TIE and  
890 TEK, in hematopoietic stem cells. *Blood* **89**, 4317-4326 (1997).
- 891 38 Cabezas-Wallscheid, N. *et al.* Vitamin A-Retinoic Acid Signaling Regulates  
892 Hematopoietic Stem Cell Dormancy. *Cell* **169**, 807-823 e819,  
893 doi:10.1016/j.cell.2017.04.018 (2017).
- 894 39 Majeti, R., Park, C. Y. & Weissman, I. L. Identification of a hierarchy of multipotent  
895 hematopoietic progenitors in human cord blood. *Cell Stem Cell* **1**, 635-645,  
896 doi:10.1016/j.stem.2007.10.001 (2007).
- 897 40 Randall, T. D. & Weissman, I. L. Phenotypic and functional changes induced at the  
898 clonal level in hematopoietic stem cells after 5-fluorouracil treatment. *Blood* **89**, 3596-  
899 3606 (1997).
- 900 41 Bernitz, J. M., Kim, H. S., MacArthur, B., Sieburg, H. & Moore, K. Hematopoietic Stem  
901 Cells Count and Remember Self-Renewal Divisions. *Cell* **167**, 1296-1309 e1210,  
902 doi:10.1016/j.cell.2016.10.022 (2016).
- 903 42 Pietras, E. M., Warr, M. R. & Passegue, E. Cell cycle regulation in hematopoietic stem  
904 cells. *J Cell Biol* **195**, 709-720, doi:10.1083/jcb.201102131 (2011).
- 905 43 Picelli, S. *et al.* Full-length RNA-seq from single cells using Smart-seq2. *Nat Protoc* **9**,  
906 171-181, doi:10.1038/nprot.2014.006 (2014).
- 907 44 Love, M. I., Huber, W. & Anders, S. Moderated estimation of fold change and dispersion  
908 for RNA-seq data with DESeq2. *Genome Biol* **15**, 550, doi:10.1186/s13059-014-0550-8  
909 (2014).
- 910 45 Du, W. *et al.* Inflammation-mediated notch signaling skews fanconi anemia  
911 hematopoietic stem cell differentiation. *J Immunol* **191**, 2806-2817,  
912 doi:10.4049/jimmunol.1203474 (2013).
- 913 46 Laurenti, E. *et al.* Hematopoietic stem cell function and survival depend on c-Myc and N-  
914 Myc activity. *Cell Stem Cell* **3**, 611-624, doi:10.1016/j.stem.2008.09.005 (2008).
- 915 47 Pervaiz, S., Taneja, R. & Ghaffari, S. Oxidative stress regulation of stem and progenitor  
916 cells. *Antioxid Redox Signal* **11**, 2777-2789, doi:10.1089/ars.2009.2804 (2009).
- 917 48 Park, C. S., Shen, Y., Lewis, A. & Lacorazza, H. D. Role of the reprogramming factor  
918 KLF4 in blood formation. *J Leukoc Biol* **99**, 673-685, doi:10.1189/jlb.1RU1215-539R  
919 (2016).
- 920 49 Ma, X. Y. *et al.* Malat1 as an evolutionarily conserved lncRNA, plays a positive role in  
921 regulating proliferation and maintaining undifferentiated status of early-stage  
922 hematopoietic cells. *BMC Genomics* **16**, 676, doi:10.1186/s12864-015-1881-x (2015).
- 923 50 Subramanian, A. *et al.* Gene set enrichment analysis: a knowledge-based approach for  
924 interpreting genome-wide expression profiles. *Proc Natl Acad Sci U S A* **102**, 15545-  
925 15550, doi:10.1073/pnas.0506580102 (2005).
- 926 51 Yu, G., Wang, L. G., Han, Y. & He, Q. Y. clusterProfiler: an R package for comparing  
927 biological themes among gene clusters. *OMICS* **16**, 284-287, doi:10.1089/omi.2011.0118  
928 (2012).

- 929 52 Ashburner, M. *et al.* Gene ontology: tool for the unification of biology. The Gene  
930 Ontology Consortium. *Nat Genet* **25**, 25-29, doi:10.1038/75556 (2000).
- 931 53 Park, I. K. *et al.* Bmi-1 is required for maintenance of adult self-renewing haematopoietic  
932 stem cells. *Nature* **423**, 302-305, doi:10.1038/nature01587 (2003).
- 933 54 Dykstra, B., Olthof, S., Schreuder, J., Ritsema, M. & de Haan, G. Clonal analysis reveals  
934 multiple functional defects of aged murine hematopoietic stem cells. *J Exp Med* **208**,  
935 2691-2703, doi:10.1084/jem.20111490 (2011).
- 936 55 Morrison, S. J. & Weissman, I. L. The long-term repopulating subset of hematopoietic  
937 stem cells is deterministic and isolatable by phenotype. *Immunity* **1**, 661-673 (1994).
- 938 56 Nestorowa, S. *et al.* A single-cell resolution map of mouse hematopoietic stem and  
939 progenitor cell differentiation. *Blood* **128**, e20-31, doi:10.1182/blood-2016-05-716480  
940 (2016).
- 941 57 Szade, K., Bukowska-Strakova, K., Zukowska, M., Jozkowicz, A. & Dulak, J. Analysis  
942 of Cell Cycle Status of Murine Hematopoietic Stem Cells. *Methods Mol Biol* **1516**, 91-  
943 99, doi:10.1007/7651\_2016\_361 (2016).
- 944 58 Morrison, S. J., Hemmati, H. D., Wandycz, A. M. & Weissman, I. L. The purification  
945 and characterization of fetal liver hematopoietic stem cells. *Proc Natl Acad Sci U S A* **92**,  
946 10302-10306 (1995).
- 947 59 Jiang, H., Lei, R., Ding, S. W. & Zhu, S. Skewer: a fast and accurate adapter trimmer for  
948 next-generation sequencing paired-end reads. *BMC Bioinformatics* **15**, 182,  
949 doi:10.1186/1471-2105-15-182 (2014).
- 950 60 Dobin, A. *et al.* STAR: ultrafast universal RNA-seq aligner. *Bioinformatics* **29**, 15-21,  
951 doi:10.1093/bioinformatics/bts635 (2013).
- 952 61 Wang, X., Terfve, C., Rose, J. C. & Markowitz, F. HTSanalyzeR: an R/Bioconductor  
953 package for integrated network analysis of high-throughput screens. *Bioinformatics* **27**,  
954 879-880, doi:10.1093/bioinformatics/btr028 (2011).
- 955
